# Supplementary material
Source: PubMed Central journal article supplement (PMC4424077)
Supplement: NIHMS668718-supplement.pdf [file NIHMS668718-supplement.pdf]

1  
2  
3  
4  
5  
6  
7  
8  
9  
10  
11  
12

**A 190 base pair, TGF- $\beta$  responsive tooth and fin enhancer is required for stickleback *Bmp6* expression**

Priscilla A. Erickson<sup>a</sup>, Phillip A. Cleves<sup>a</sup>, Nicholas A. Ellis<sup>a</sup>, Kevin T. Schwalbach<sup>a</sup>, James C. Hart<sup>a</sup>, and Craig T. Miller<sup>a,\*</sup>

<sup>a</sup> Department of Molecular and Cell Biology, University of California, Berkeley, CA, 94720

\* Address correspondence to: [ctmiller@berkeley.edu](mailto:ctmiller@berkeley.edu)

13 **Abstract**

14           The ligands of the Bone Morphogenetic Protein (BMP) family of developmental  
15 signaling molecules are often under the control of complex *cis*-regulatory modules and play  
16 diverse roles in vertebrate development and evolution. Here, we investigated the *cis*-regulatory  
17 control of stickleback *Bmp6*. We identified a 190 bp enhancer ~2.5 kilobases 5' of the *Bmp6*  
18 gene that recapitulates expression in developing teeth and fins, with a core 72 bp sequence that is  
19 sufficient for both domains. By testing orthologous enhancers with varying degrees of sequence  
20 conservation from outgroup teleosts in transgenic reporter gene assays in sticklebacks and  
21 zebrafish, we found that the function of this regulatory element appear to have been conserved  
22 for over 250 million years of teleost evolution. We show that a predicted binding site for the  
23 TGFβ effector Smad3 in this enhancer is required for enhancer function and that  
24 pharmacological inhibition of TGFβ signaling abolishes enhancer activity and severely reduces  
25 endogenous *Bmp6* expression. Finally, we used TALENs to disrupt the enhancer *in vivo* and find  
26 that *Bmp6* expression is dramatically reduced in teeth and fins, suggesting this enhancer is  
27 necessary for expression of the *Bmp6* locus. This work identifies a relatively short regulatory  
28 sequence that is required for expression in multiple tissues and, combined with previous work,  
29 suggests that shared regulatory networks control limb and tooth development.

30  
31 **Keywords**

32 Bone Morphogenetic Protein, enhancer, tooth development, stickleback, zebrafish, *Bmp6*, TGFβ  
33  
34

## 35 **Introduction**

36           Bone Morphogenetic Protein (BMP) ligands, the largest subfamily of TGF $\beta$  ligands, play  
37 multiple essential roles during vertebrate development (Hogan, 1996; Kingsley, 1994; Massagué,  
38 2012), including during craniofacial and tooth development (Nie et al., 2006). Many vertebrate  
39 organs develop through reciprocal permissive and instructive signaling between adjacent  
40 epithelial and mesenchymal tissues, often involving multiple BMP ligands (Bellusci et al., 1996;  
41 Dassule and McMahon, 1998; Dudley et al., 1999; Jung et al., 1998). These pleiotropic functions  
42 of BMP ligands are orchestrated by typically large, modular, regulatory regions, which work  
43 together to drive complex spatiotemporally restricted expression patterns (Pregizer and  
44 Mortlock, 2009).

45           In humans, regulatory variation in *Bmp* genes has been associated with developmental  
46 disorders including brachydactyly and other birth defects (Dathe et al., 2009; Justice et al.,  
47 2012), as well as colorectal cancer (Houlston et al., 2008; Lubbe et al., 2012). In other animals,  
48 variation in the expression of BMP genes has also been associated with major evolved changes  
49 in morphology, including beak shape in Darwin's finches (Abzhanov et al., 2004), jaw size and  
50 shape in cichlid fish (Albertson et al., 2005), and tooth number in stickleback fish (Cleves et al  
51 2014).

52           While the *cis*-regulatory architecture of *Bmp2*, *Bmp4*, *Bmp5*, and *Bmp7* has been studied  
53 in mice (Adams et al., 2007; Chandler et al., 2007; Guenther et al., 2008; Jumlongras et al.,  
54 2012), less is known about *Bmp6* and *Bmp* gene regulation in other vertebrates. Although not  
55 required for viability in the mouse, *Bmp6* is required for axial skeletal patterning (Solloway et  
56 al., 1998), kidney function (Dendooven et al., 2011), and physiological iron regulation  
57 (Andriopoulos et al., 2009). Non-coding variants in human *Bmp6* have been associated with

58 human height variation (Gudbjartsson et al., 2008; Wood et al., 2014), as well as orofacial  
59 clefting birth defects (Shi et al., 2012). A *cis*-regulatory allele of stickleback *Bmp6* with reduced  
60 *Bmp6* expression in developing tooth tissue has recently been shown to be associated with  
61 evolved increases in tooth number in derived freshwater sticklebacks, likely adaptive for the shift  
62 in diet in freshwater sticklebacks relative to their marine ancestors (Cleves et al., 2014).

63 BMP signaling plays complex and, in general, poorly understood roles during the  
64 development of placodes. During tooth development, multiple BMP genes are expressed  
65 dynamically in developing odontogenic epithelia and mesenchyme (Aberg et al., 1997; Vainio et  
66 al., 1993). Several lines of evidence reveal BMP signaling plays activating roles during  
67 odontogenesis. First, epithelial BMP4 activates *Msx* expression in the mesenchyme, and  
68 exogenous BMP from a bead (Bei and Maas, 1998; Chen et al., 1996) or transgene (Zhao et al.,  
69 2000) can partially rescue tooth development in *Msx1* mutant mice. Second, in mice, teeth arrest  
70 at the bud-to-cap transition in *Bmpr1a* mutants (Andl et al., 2004; Liu et al., 2005). Third,  
71 exogenous BMP4 beads can induce molar development in mice (Kavanagh et al., 2007). Fourth,  
72 in fish, pharmacological inhibition of BMP signaling can inhibit tooth formation in cichlids  
73 (Fraser et al., 2013). In contrast, other evidence supports BMP signaling playing inhibitory  
74 effects during the development of teeth and other placodes. In mice, *Pax9* expression marks early  
75 dental mesenchyme, and BMP2 and BMP4 inhibit *Pax9* expression (Neubüser et al., 1997). In  
76 zebrafish, inhibition of BMP signaling produces supernumerary teeth with altered morphology  
77 (Jackman et al., 2013). During development of both feather and hair placodes, BMPs play  
78 inhibitory roles (Botchkarev et al., 1999; Jung et al., 1998; Mou et al., 2006, 2011), and  
79 suppression of epithelial BMP signaling is required for hair placode induction (reviewed in  
80 Biggs and Mikkola, 2014). Together these results suggest that complex positive and negative

81 interactions between epithelial and mesenchymal BMPs are critical for placode development, yet  
82 the regulation of these interactions remains less well understood.

83         Despite the major role BMP signaling plays during tooth development, little is known  
84 about the *cis*-regulatory sequences that drive dynamic *Bmp* expression in early developing  
85 odontogenic epithelia and mesenchyme. In mice, a late-stage ameloblast enhancer has been  
86 identified for the *Bmp4* gene (Feng et al., 2002); however this enhancer is not reported to be  
87 active during embryogenesis, or in dental mesenchyme. A second enhancer of mouse *Bmp4* has  
88 been described that is active during embryogenesis and drives expression in dental epithelium  
89 but not mesenchyme (Jumlongras et al., 2012). Tooth epithelial and mesenchymal enhancers of  
90 the mouse *Bmp2* gene have been localized to a ~150 kb region 3' of *Bmp2* (Chandler et al.,  
91 2007), however these enhancers have not yet been further mapped, and in general, *cis*-regulation  
92 of BMPs in dental mesenchyme is poorly understood. Furthermore, since mice are  
93 monophyodonts that form one wave of primary teeth and no replacements, less is known about  
94 *cis*-regulatory elements that drive expression in developing and replacement teeth in  
95 polyphyodont vertebrates (such as fish) that replace their teeth continuously. Because of the  
96 recently identified *cis*-regulatory allele of *Bmp6* associated with evolved changes in stickleback  
97 tooth number (Cleves et al., 2014) and to dissect epithelial and mesenchymal *cis*-regulation of  
98 vertebrate Bmp signaling, we sought to begin to identify the *cis*-regulatory architecture of the  
99 stickleback *Bmp6* gene.

100

## 101 **Methods:**

102 *Animal statement and fish husbandry:*

103 All animal work was approved by the Institutional Animal Care and Use Committee of  
104 the University of California-Berkeley (protocol number R330). Sticklebacks (*Gasterosteus*  
105 *aculeatus*) were raised in ~10% seawater (3.5 g/l Instant Ocean salt, 0.217 ml/l 10% sodium  
106 bicarbonate) at 18° C, and crosses were generated by *in vitro* fertilization. Zebrafish (*Danio*  
107 *rerio*) were raised in a recirculating system under standard conditions, and embryos were  
108 collected either from natural spawning or *in vitro* fertilization and raised at 28.5 degrees  
109 (Westerfield, 2007).

110

#### 111 *BAC Isolation and Recombineering:*

112 Bacterial Artificial Chromosomes (BACs) from the CHORI-213 and CHORI-215  
113 (Salmon River marine and Paxton benthic freshwater stickleback, respectively) BAC libraries  
114 were identified by overgo screening (Ross et al., 1999) using the following overgoes: 5'-  
115 TGTGACGTTGACCTCAGCTAGACT-3' and 5'-GAGGATTTAAACCGGGAGTCTAGC-3'.  
116 BAC ends were sequenced using Sp6 and T7 primers and mapped to the stickleback genome  
117 using the UCSC browser. BAC CHORI-215-29E12 was chosen for reporter analysis because  
118 *Bmp6* was relatively centrally located in the BAC. Inverted Tol2 sites were recombineered into  
119 the Lox511 site of the pTarbac2.1 backbone according to Suster et al. (2011) using primers  
120 PTARBAC\_tol2FWD and PTARBAC\_tol2REV, and ampicillin resistance was used to select  
121 successfully recombineered BAC clones. To place GFP into exon 1 of *Bmp6* as a reporter, a  
122 GFP/kanamycin resistant cassette was amplified from pGFP-FRT-Kan-FRT (Suster et al., 2011)  
123 using primers GFP\_Bmp6\_for and GFP\_Bmp6\_rev (Table S1), which contained 50 bp  
124 homology to the beginning and end of the first exon of stickleback *Bmp6*, respectively. This

125 construct was then recombineered into the BAC containing iTol2 sites to produce the final  
126 reporter BAC (see Fig. 6A-C).

127 *Enhancer Constructs:*

128         The vector for the stickleback 2.8 kb enhancer/promoter construct was generated using  
129 pENTRbasGFP and pTolDest (Villefranc et al., 2007) using Gateway cloning to produce a  
130 construct with the carp *β-actin* basal promoter (Scheer and Campos-Ortega, 1999) upstream of  
131 EGFP, flanked by Tol2 sites (Urasaki et al., 2006). Next, a 2,810 bp sequence upstream of the  
132 predicted *Bmp6* transcriptional start site was PCR amplified from BAC CHORI-213-256N24  
133 using primers Gac\_3kb\_for and Gac\_3kb\_rev and cloned upstream of the carp *β-actin* promoter  
134 using a ClaI restriction site. Blocks of conserved sequences within the 2.8 kb construct were  
135 identified as CS1, CS2, and CS3 from the UCSC 8 species Multiz conservation track (see Fig.  
136 1A). These sequences were cloned into ClaI site of the carp *β-actin* reporter construct using  
137 primers shown in Table S1. CS1 was cloned with Gac\_3kb\_for and Gac\_CS1\_rev. CS2 was  
138 cloned with Gac\_CS2\_for and Gac\_CS2\_rev. CS3 was cloned with Gac\_CS3\_for and  
139 Gac\_3kb\_rev. CS2+3 was cloned with Gac\_CS2\_for and Gac\_3kb\_rev. Because the CS1  
140 fragment drove weak expression with the *β-actin* promoter, we switched to using a well-  
141 characterized zebrafish *hsp70* promoter construct, which we found to drive much brighter  
142 expression in transgenic stickleback embryos. CS1 and CS2+3 were also cloned into the *hsp70*  
143 promoter construct for additional testing using the same genomic primer sequences but with Nhe  
144 and BamHI restriction sites in place of ClaI. The 190 bp and 72 bp enhancer sequences were  
145 amplified from the 2.8 kb construct with primers indicated in Table S1 and cloned into the *hsp70*  
146 construct.

147 The orthologous enhancer sequences were identified in other teleost genomes using the  
148 UCSC genome browser ([genome.ucsc.edu](http://genome.ucsc.edu)) to identify sequence conservation. Zebrafish and  
149 medaka (*Oryzias latipes*) wild-type genomic DNA was isolated by standard phenol-chloroform  
150 extraction and enhancers were amplified using primers (Table S1) designed from the respective  
151 genome assemblies (*zv9/danRer7* and *oryLat2*) and cloned into the *hsp70* promoter construct.  
152 The Atlantic cod (*Gadus morhua*) enhancer DNA sequence was identified by sequence  
153 conservation on contig CAEA01327401 of the Atlantic cod genome assembly (UCSC,  
154 *gadMor1*). This short, unassembled contig is flanked by repetitive sequence, but the intervening  
155 sequence contains a 94 bp stretch that has 92.4% sequence identity to the stickleback enhancer  
156 and is likely the orthologous sequence. We synthesized a 130 bp construct of Atlantic cod  
157 sequence by using two primers for amplification (*Gmo\_for* and *Gmo\_rev*, see Table S1) and two  
158 additional overlapping oligonucleotides as template (*Gmo\_temp1* and *Gmo\_temp2*). The  
159 template oligonucleotides were added to standard Phusion (NEB) PCR reaction at a  
160 concentration of 0.05  $\mu$ M to amplify the full 130bp sequence, which was then cloned into the  
161 Tol2 construct as described above.

162

### 163 *Sequence Analysis:*

164 Sequence alignments were generated using ClustalW2  
165 (<http://www.ebi.ac.uk/Tools/msa/clustalw2/>) (Larkin et al., 2007) and Boxshade  
166 ([http://www.ch.embnet.org/software/BOX\\_form.html](http://www.ch.embnet.org/software/BOX_form.html)). Binding sites were predicted with the  
167 UniProbe database ([http://the\\_brain.bwh.harvard.edu/uniprobe/](http://the_brain.bwh.harvard.edu/uniprobe/)) (Newburger and Bulyk, 2009)  
168 and PROMO ([http://algggen.lsi.upc.es/cgi-bin/promo\\_v3/promo/promoinit.cgi?dirDB=TF\\_8.3](http://algggen.lsi.upc.es/cgi-bin/promo_v3/promo/promoinit.cgi?dirDB=TF_8.3))  
169 (Farre et al., 2003; Messeguer et al., 2002).



170

171 *Imaging and Microscopy:*

172 Transgenic lines were imaged using a Leica DM2500 compound microscope equipped  
173 with a Leica DFC500 camera, a Leica M165FC dissecting microscope equipped with a DFC340  
174 FX camera, or a Zeiss 700 confocal microscope. Transgenic fish were fixed for 4 hours at 4°C in  
175 either 4% paraformaldehyde in 1X PBS or 10% neutral buffered formalin. For Alizarin red  
176 fluorescent counterstaining of GFP lines, 0.01% Alizarin red was added to the fixative. Tooth  
177 number was counted on the DM2500 with TX2 filter to visualize Alizarin-stained teeth. Tooth  
178 germs with GFP+ epithelia were counted on photographs of GFP fluorescence.

179

180 *Fish injections and line generation:*

181 Transposase mRNA was produced from the pCS2-TP plasmid (Kawakami et al., 2004)  
182 with the mMessage mMachine SP6 *in vitro* transcription kit (Ambion) according to  
183 manufacturer's instructions and purified with a Qiagen RNeasy column. Zebrafish injections  
184 were performed with 25 ng/μL plasmid DNA and 37.5 ng/μL transposase and 0.05% phenol red  
185 as previously described (Fisher et al., 2006). Because stickleback embryos are much larger than  
186 zebrafish embryos, the DNA and RNA concentrations were increased to 37.5 and 75 ng/μL  
187 respectively. Stable transgenic lines were generated by outcrossing injected fish to non-  
188 transgenic fish and visually screening for fluorescent transgenic offspring. At least two stable  
189 lines were observed for each construct to ensure fluorescent patterns were due to the transgene  
190 and not artifacts of the transgene integration sites.

191

192 *Site directed mutagenesis:*

193 Mutagenesis primers were designed using the online Quickchange tool  
194 (<http://www.genomics.agilent.com/primerDesignProgram>). For constructs containing multiple  
195 mutations, the mutagenesis was performed in multiple rounds. Mutagenesis reactions were  
196 performed with 125 ng of each primer, 50 ng plasmid template, 200  $\mu$ M dNTPs, and Pfu Turbo  
197 polymerase and buffer. Cycling conditions were 95°C for 30 seconds, followed by 16 cycles of  
198 95°C / 30 s, 55°C / 60 s, and 68°C / 780 s. Primer sequences can be found in supplementary  
199 Table 1; the mutated sequences are shown in Fig. 3A. *DpnI* was added immediately after cycling,  
200 and the reaction was incubated for 1 hr at 37°C, then immediately transformed into Top10  
201 chemically competent *E. coli* cells.

202

203 *Drug treatments:*

204 SB431542 and XAV939 (Sigma) were dissolved in DMSO to concentrations of 100  $\mu$ M  
205 and 10  $\mu$ M, respectively. The drug was then diluted into stickleback water or zebrafish system  
206 water to working concentrations (25-100  $\mu$ M for SB431542 and 5-10  $\mu$ M for XAV939). A  
207 DMSO vehicle control was done in parallel with all drug treatments. Drug treatment was  
208 performed in 6- or 24-well cell culture dishes. Sticklebacks were treated from 2 dpf to 5 dpf for  
209 observation of pectoral and median fin expression, and for 5-7 days post-hatching for  
210 observation of tooth GFP. Zebrafish were treated beginning at 10 hpf for observation of median  
211 fin and beginning at 24 hpf for pectoral fin and tooth expression. For multiday treatments, fresh  
212 solution was applied every 48 hours until the end of the experiment.

213

214 *In situ hybridization (ISH):*

215 *Bmp6 in situ* hybridization was performed on embryos and newly-hatched juveniles as  
216 previously described (Cleves et al., 2014). For pharyngeal tooth and gill *in situs*, the branchial  
217 skeleton was dissected out of the embryo and cut along the dorsal midline prior to the  
218 hybridization step.

219

220 *Mutagenesis using TALENs:*

221 TAL Effector Nucleases (TALENs) were targeted to the predicted Smad3 binding site  
222 within the 190 bp enhancer using TAL Effector Nuclear Targeter 2.0 ([https://tale-  
224 nt.cac.cornell.edu/](https://tale-<br/>223 nt.cac.cornell.edu/)) using the Cermak architecture (Cermak et al., 2011; Doyle et al., 2012).  
225 TALEN plasmids were generated using the RVDs shown in Table S4. TALEN mRNAs were  
226 produced with the Mmessage Mmachine kit (Ambion), purified with Qiagen RNeasy columns,  
227 and injected into one-cell stickleback embryos at a concentration of 40 ng/μL for each mRNA  
228 plus 0.05% phenol red. Embryos and juvenile fish were screened for lesions in the Smad3 site by  
229 screening for loss of an XbaI cut site in a 144 bp PCR product amplified with primers  
230 Gac\_190\_for and Gac\_72\_rev (see Fig. 4G). F1 animals with deletions visible on a 2% agarose  
231 gel (~15 bp or larger) were crossed to generate animals used in *in situ* hybridization. Because the  
232 F1 parents carried different TALEN-induced lesions, the F2 animals used for ISH were  
233 transheterozygotes for two slightly different alleles of the enhancer deletion (see Fig. 6E).

233

234 **Results:**

235 **A *Bmp6* reporter BAC recapitulates endogenous *Bmp6* expression**

236 To begin to identify the *cis*-regulatory architecture of the stickleback *Bmp6* gene, we  
237 generated a *Bmp6* reporter line by identifying a bacterial artificial chromosome (CHORI

238 BAC215-29E12) containing 180 kb of sequence starting ~52 kb upstream of *Bmp6*. Inverted  
239 Tol2 sequences were recombineered into the backbone of this BAC and the first exon of *Bmp6*  
240 was replaced with GFP coding sequence. This transgenic construct drove GFP reporter  
241 expression in a variety of tissues throughout development (Fig. S1), including the embryonic  
242 tailbud following somitogenesis (3.5 dpf), the embryonic heart and ventrolateral cells in the  
243 pharyngeal region (4 dpf), the distal edge of the developing pectoral fin, and the distal edge of  
244 the median fin (5 dpf). After hatching (10-15 dpf), expression was seen in oral and pharyngeal  
245 teeth, the pericardium, cells surrounding the opercle and branchiostegal rays, gill buds, and gill  
246 rakers.

247 We compared this transgene expression pattern to the expression pattern of endogenous  
248 *Bmp6* mRNA via *in situ* hybridization. We observed *Bmp6* expression in nearly all of the same  
249 domains as the reporter BAC (Fig. S2), including the tailbud (at 3.5 dpf), heart, the distal edges  
250 of the median and pectoral fins (at 5 dpf), gills, gill rakers, and in the previously described  
251 (Cleves et al., 2014) epithelium and mesenchyme of developing teeth (assayed at ~12 dpf).  
252 However, several domains observed by *in situ* hybridization were not observed in the BAC  
253 transgenic line, including the notochord, the dorsal medial diencephalon, the eyes, and the ears  
254 (Fig. S2), suggesting that regulatory elements lying outside of the 180 kb of genomic sequence  
255 contained within the BAC control these *Bmp6* expression domain.

256

### 257 **A conserved 190 bp enhancer drives tooth, median fin, and pectoral fin expression in both** 258 **stickleback and zebrafish**

259 To begin to identify regulatory elements contained within this 180 kb genomic interval  
260 containing *Bmp6*, we first cloned a construct containing ~2.8 kb of sequence immediately

261 upstream of stickleback *Bmp6* containing regions of sequence conserved among other teleosts  
262 (Fig. 1A). This construct drove GFP expression in a number of tissues that were similar to  
263 expression patterns driven by the BAC (Fig. S3, compare to Fig. S1), including the tailbud, the  
264 heart, pectoral and median fins, oral and pharyngeal teeth, gills, and the pericardium. Other  
265 domains driven by the BAC were not observed in the 5' construct, including gill rakers, opercle,  
266 and branchiostegal rays; these domains are likely driven by more distal regulatory elements  
267 contained within the BAC but excluded from the 2.8 kb sequence. Combined, these results  
268 suggest that much of the regulatory information for *Bmp6* is contained within the 2.8 kb  
269 upstream sequence, but that other regulatory elements drive additional expression domains.

270 We hypothesized that the different anatomical sites of expression driven by the 2.8 kb  
271 fragment result from multiple anatomically specific enhancers within this sequence. We first  
272 tested three non-overlapping subclones, each containing a block of evolutionarily conserved  
273 sequence (Fig. 1A). While the most 5' subclone (CS1) drove robust reporter gene expression in  
274 most domains of the 2.8 kb fragment, neither the middle (CS2) nor 3' subclone (CS3) drove  
275 detectable GFP expression in fins, teeth, or other domains driven by the 2.8 kb fragment at the 3-  
276 5 dpf or post-hatching (10-13 dpf) stages. Furthermore, a construct containing CS2 + CS3 also  
277 drove no detectable pattern of GFP with either the *β-actin* or *hsp70* promoter. Next, we focused  
278 on the 5'-most region (CS1), and tested a 190 bp fragment highly conserved within teleosts (Fig.  
279 1B). This 190 bp fragment drove robust GFP expression in the distal edges of the pectoral and  
280 median fins, and oral and pharyngeal teeth (Fig. 1C-E). Within developing teeth, GFP expression  
281 was observed in the inner dental epithelium (IDE) for all constructs (Fig. S4) as well as the  
282 interior mesenchyme of mature functional teeth (Fig. 1D), similar to endogenous *Bmp6*  
283 expression during tooth development (Cleves et al., 2014). Robust tooth GFP expression was

284 seen in all teeth at all stages examined including in juveniles and adults, suggesting tooth  
285 enhancer activity is present in both primary and replacement teeth (Fig. 1D-E, data not shown).  
286 Some domains, including the gills, were lost when CS1 was reduced to the 190bp fragment,  
287 suggesting that flanking sequence is required for these domains. When the orientation of the  
288 enhancer was flipped with respect to the *hsp70* promoter, 77% (38/49) of injected fish had  
289 pectoral and/or median fin expression at 5 dpf, and 69% (27/39) had oral and/or pharyngeal tooth  
290 expression at 13 dpf. This result suggests that this enhancer functions regardless of orientation to  
291 the promoter. Combined, our results suggest that most domains driven by the 2.8 kb enhancer are  
292 driven by the short 190 bp conserved sequence. This 190 bp minimal sequence does not differ  
293 between marine and freshwater sticklebacks, though several marine-freshwater sequence  
294 differences exist in the surrounding sequences of CS1.

295

### 296 **Conservation of *cis* regulatory elements and *trans* machinery in teleosts**

297       Because we used evolutionary sequence conservation to identify the 190 bp minimal  
298 enhancer and the sequence was partially conserved to zebrafish, we hypothesized that this 190 bp  
299 stickleback enhancer would show similar activity in transgenic zebrafish. Stickleback and  
300 zebrafish are ~250 million years divergent (Near et al., 2012) and share only 3 short blocks  
301 (totaling 28 bp, Fig. 2A) of perfectly conserved nucleotides in the middle of the enhancer.  
302 However, the stickleback enhancer robustly drove a highly similar expression pattern in  
303 zebrafish, with expression in the distal edges of the median and pectoral fins, and pharyngeal  
304 tooth epithelium and mesenchyme (Fig. 2B-D), suggesting that the *trans* factors activating the  
305 enhancer are conserved in distantly related teleosts. We next asked whether the orthologous  
306 sequence from the zebrafish genome had similar enhancer activity in both zebrafish and

307 sticklebacks. A construct containing 477 bp of sequence from the orthologous region of the  
308 zebrafish genome drove weak expression in these expression domains (distal edges of median  
309 and pectoral fins, and teeth) in a subset of transgenic zebrafish offspring obtained (Fig. 2E-G and  
310 Table S2). In sticklebacks, seven stable transgenic lines with the zebrafish sequence driving GFP  
311 had no fin expression, although one transgenic line displayed very faint expression in the distal  
312 edges of the median and pectoral fins (Fig. 2H-I). None of the eight lines had GFP expression in  
313 teeth (Fig. 2J). Therefore, sticklebacks and zebrafish likely share the *trans* machinery sufficient  
314 to drive expression from the stickleback sequence, but the *cis* regulatory information present in  
315 the zebrafish orthologous sequence is not sufficient to drive tooth expression in the stickleback  
316 *trans* environment.

317         Because the zebrafish enhancer shows much less sequence conservation to sticklebacks  
318 relative to other teleosts (Fig. 2A), we hypothesized that the loss of robustness and loss of tooth  
319 expression may be unique to the zebrafish *cis*-regulatory element. We generated constructs  
320 containing the orthologous enhancer sequences of a beloniform (medaka) and a gadiform  
321 (Atlantic cod), which fall between zebrafish and sticklebacks in the teleost phylogeny (Near et  
322 al., 2012). We found that sequences from both additional species drove expression in fins and  
323 teeth in both stickleback and zebrafish embryos (Fig. S5, Table S2), although the cod enhancer  
324 appeared to be slightly less robust (Table S2).

325         Based on the apparent partial conservation of enhancer function in zebrafish and the  
326 conserved activities of the medaka and cod enhancers, we further shortened the stickleback  
327 enhancer to contain the sequence most highly conserved among teleosts, a 72 bp sequence near  
328 the center of the 190 bp construct, and hypothesized that it would drive the tooth, median fin, and  
329 pectoral fin expression domains. In support of this hypothesis, this construct in a stable line of

330 zebrafish was sufficient to drive strong GFP expression in teeth and median and pectoral fins  
331 (Fig. S6). Notably, the heart domain driven by this construct was considerably brighter relative  
332 to the 190 bp enhancer, suggesting that this short sequence may have lost additional repressor  
333 elements that limit expression in the heart. A similar pattern of brighter heart expression was  
334 observed in stickleback injected with this construct compared to the 190 bp larger construct (data  
335 not shown). These results suggest that the flanking conserved sequences are not required for the  
336 basic enhancer pattern in fins and teeth, but may be important for fine-tuning the transcriptional  
337 output.

338

### 339 **A predicted Smad3 binding site is required for enhancer function.**

340 To identify candidate transcription factor binding sites within the 190 bp enhancer, we  
341 used UniProbe and PROMO (Newburger and Bulyk, 2009; Farre et al., 2003; Messeguer et al.,  
342 2002) and found predicted binding sites of transcription factors in several signaling pathways  
343 involved in developmental regulation: FGF (PEA3), retinoic acid (RAR- $\gamma$ ), Wnt (TCF/Lef), and  
344 TGF $\beta$  (Smad3), as well as a predicted homeodomain binding site (Fig. 3A). We were  
345 particularly interested in the homeodomain binding site given the known crosstalk between the  
346 *Msx1* and *Bmp4* genes during mouse tooth development (Bei and Maas, 1998; Chen et al., 1996;  
347 Jumlongras et al., 2012), and the predicted TCF/Lef sites, given the previously described roles of  
348 Wnt signaling regulating *Bmp4* dental mesenchyme expression in mice (Fujimori et al., 2010;  
349 O'Connell et al., 2012). We quantified the number of stickleback embryos showing pectoral  
350 and/or median fin, as well as pharyngeal and/or oral tooth expression, when injected with  
351 constructs containing mutated binding sites. The mutation of TCF/Lef and Smad3 binding sites  
352 significantly decreased the percentage of fish with median and/or pectoral fin expression



353 domains, whereas the predicted PEA3, RAR- $\gamma$ , and homeodomain mutations did not (Fig. 3B).  
354 Likewise, only the mutations in predicted TCF/Lef and Smad3 sites affected tooth expression,  
355 with especially reduced expression when the predicted Smad3 binding sites were mutated (Fig.  
356 3C). We made stable zebrafish lines for each of the Smad3 and TCF/Lef mutated enhancers and  
357 found that the Smad3-mutated reporter construct did not drive robust expression in zebrafish fins  
358 or teeth, while the TCF/Lef mutated construct did drive these domains, albeit at apparently  
359 reduced levels (Fig. S7). Since the Smad3-mutated construct did not drive fin or tooth expression  
360 in zebrafish, we generated a stable line in sticklebacks and found that this line similarly did not  
361 drive detectable median fin, pectoral fin, or tooth expression (Fig. 4J). Therefore, the predicted  
362 Smad3 sites are required for normal enhancer output, while TCF/Lef sites may be responsible for  
363 expression level but not tissue specificity.

364

365 **A small molecule inhibitor of TGF $\beta$  signaling, but not a small molecule inhibitor of Wnt**  
366 **signaling, abolishes enhancer function**

367 Since the predicted Smad3 binding site was necessary for enhancer function, we  
368 hypothesized that reducing TGF $\beta$  signaling (mediated by Smad3) would result in a loss of  
369 expression driven by the enhancer. To pharmacologically inhibit TGF $\beta$  signaling, we treated  
370 transgenic sticklebacks and zebrafish embryos with SB431542, a specific inhibitor of ALK4/5  
371 phosphatase activity that abrogates TGF- $\beta$  signaling in zebrafish (Inman et al., 2002; Sun et al.,  
372 2006). After 6 days of treatment in sticklebacks, GFP expression driven by the 190 bp enhancer  
373 was reduced in a dose-dependent manner in the epithelium, but not mesenchyme, of developing  
374 pharyngeal teeth, with tooth epithelial expression abolished at 50  $\mu$ M and reduced at 25  $\mu$ M (Fig.  
375 4A-C). Tooth mesenchymal expression was slightly diminished at 50  $\mu$ M and apparently

376 unaffected at 25  $\mu$ M. Similarly, GFP reporter expression was lost in the pharyngeal teeth of  
377 newly hatched zebrafish upon treatment with SB431542 from 24 hpf until 5 dpf (Fig. 4D-F). In  
378 sticklebacks, we also saw a reduction, but not complete loss, of pectoral and median fin  
379 expression driven by the transgene upon treatment with SB431542 (Fig. S8), while the reduction  
380 was more severe in the fins of zebrafish. Combined with our site-directed mutagenesis of the  
381 Smad3 binding site result, these pharmacological data suggest that TGF $\beta$  signaling mediated by  
382 ALK4/5 (likely signaling via Smad3 binding) is necessary for tooth epithelium enhancer activity.  
383 However other signals likely contribute to the expression in the pectoral and median fins and  
384 tooth mesenchyme, as drug treatment did not completely abolish these expression domains in  
385 sticklebacks.

386         Since the mutation of TCF/Lef binding sites appeared to decrease enhancer activity in  
387 sticklebacks and zebrafish (Fig. 3, Fig. S7), we hypothesized that Wnt signaling might be an  
388 additional input into the 190 bp *Bmp6* enhancer. To test this hypothesis, we treated transgenic  
389 fish with SB431542, XAV939 (a specific inhibitor of the Wnt signaling pathway that is active in  
390 zebrafish (Huang et al., 2009)), or both drugs in combination at low and high doses. Treatment  
391 with a high-dose combination of XAV939 and SB431542 decreased the standard length of fish  
392 (data not shown), possibly indicating a slight developmental delay. With XAV939 or SB431542  
393 treatment alone, there was no effect of the drug on tooth number, suggesting that neither drug  
394 alone arrests tooth development. However, the two drugs in combination significantly reduced  
395 ventral pharyngeal tooth number (Fig. 5H), including at the low dose that did not affect fish  
396 standard length, suggesting that XAV939 is bioactive in sticklebacks and that reducing Wnt and  
397 TGF $\beta$  signaling together disrupts tooth development.

398           There was no obvious qualitatively detectable effect of XAV939 treatment on the  
399 intensity of enhancer expression in the teeth, either alone or in combination with SB431542 (Fig.  
400 5; compare D and E to A, and compare F and G to B and C). However, tooth mesenchymal GFP  
401 in the combined drug treatment appeared slightly lower than with SB431542 treatment alone  
402 (insets of Fig. 5). Importantly, we never saw a complete loss of mesenchymal GFP with any drug  
403 treatment, but frequently saw complete loss of epithelial GFP with SB431542 treatment. To  
404 quantify the effect of drug treatment on epithelial GFP expression, we counted the number of  
405 GFP<sup>+</sup> tooth epithelia (regardless of fluorescent intensity) in each treatment and expressed it as a  
406 ratio to the total number of Alizarin red-stained teeth. XAV939 had no effect on the relative  
407 number of GFP<sup>+</sup> epithelia, while SB431542 had a strong, dose-dependent effect (Fig. 5I). In  
408 combination with SB431542, there was no additional effect of XAV939 on reporter expression  
409 (GFP<sup>+</sup> epithelia in the combination treatments did not differ from treatment with SB431542  
410 alone). Combined, our results suggest that SB431542, but not XAV939, affects enhancer activity  
411 and that simultaneous inhibition of Wnt and TGF $\beta$  signaling affects tooth development.

412

### 413 **The 190 bp enhancer is necessary for *Bmp6* expression**

414           As an additional test of the importance of the predicted Smad3 binding site, we generated  
415 a pair of TALENs designed to induce mutations in this region of the enhancer (see Fig. 4G). This  
416 pair of TALENs was highly efficient at producing lesions, detected molecularly by loss of an  
417 XbaI restriction site, and confirmed by Sanger sequencing in a subset of individuals (Table S3;  
418 example deletions shown in Fig. 6E). Upon injection of these TALENs into a stable transgenic  
419 line of the 190 bp enhancer driving GFP, 95% of animals (40 of 42) showed partial or full loss of  
420 GFP fluorescence in the pectoral fins and median fin expression at 5 dpf. In those same animals,

421 95% of animals (39 of 41) also showed partial or complete loss of oral and/or pharyngeal tooth  
422 expression at 12-13 dpf (see example in Fig. 4I). Thus, the lesions generated by these TALENs  
423 are highly effective at disrupting activity driven by this 190bp enhancer.

424 We next tested whether the sequence targeted by the TALENs was necessary for *Bmp6*  
425 expression by injecting the TALENs into a stable transgenic line of the *Bmp6:GFP* BAC  
426 reporter. 91% (61/67) of animals had a reduction or complete loss of pectoral and median fin  
427 expression, and 89% (8/9) of dissected tooth plates showed severe reductions of GFP expression  
428 in the pharyngeal teeth (representative animals shown in Fig. 6 F-K). Notably, GFP expression in  
429 the embryonic and juvenile heart was detectable at seemingly unaffected levels in all animals,  
430 suggesting that the enhancer is not necessary for this expression domain. Additionally, gill  
431 expression appeared to be reduced but not completely eliminated in all animals observed (n=6),  
432 and gill raker expression was only slightly reduced. These data suggest the enhancer is required  
433 for some (e.g. pectoral fin, median fin, tooth epithelium), but not all domains of *Bmp6*  
434 expression.

435 Finally, we tested the role of the enhancer in driving endogenous *Bmp6* expression by  
436 performing *in situ* hybridization for *Bmp6* in fish *trans*-heterozygous for different TALEN-  
437 induced mutations in the predicted Smad3 binding site (Fig. 6E). In these *trans*-heterozygous  
438 fish, expression of *Bmp6* was dramatically reduced in fins, tooth epithelia and gills, but gill raker  
439 expression appeared similar to wild-type controls (Fig. 6L-Q). Despite the severe loss of *Bmp6*  
440 expression in tooth epithelia in mutant fish, expression in the mesenchyme of developing teeth  
441 was still detectable, although at apparently reduced levels (Fig. 6N-O). Thus, this enhancer is  
442 required to maintain normal levels of *Bmp6* expression in developing fins and tooth epithelia.  
443

444 **TGF $\beta$  signaling is necessary for normal *Bmp6* expression levels**

445           Since enhancer activity was lost upon treatment with a TGF $\beta$  inhibitor, and the enhancer  
446 is required for normal *Bmp6* expression, we predicted that endogenous *Bmp6* expression would  
447 likewise be reduced upon inhibition of TGF $\beta$  signaling. By *in situ* hybridization, pectoral fin and  
448 tooth epithelium expression of *Bmp6* were both reduced upon 100  $\mu$ M SB431542 treatment (Fig.  
449 7A-D). SB431542 treatment also reduced GFP expression in reporter BAC animals in fins and  
450 teeth (Fig. 7E-H). The effect of the drug on BAC-driven GFP was not robustly observed with a  
451 50  $\mu$ M treatment (data not shown), despite the strong effect that this dose had on enhancer  
452 expression (Fig. 4). Together these data support a model in which TGF $\beta$  signaling is required for  
453 *Bmp6* expression in teeth and fins and exerts its effect through the putative Smad3 binding site  
454 that is necessary for enhancer function.

455

456 **Discussion**

457 **A short, conserved enhancer with pleiotropic expression domains required for *Bmp6* tooth**  
458 **and fin expression**

459           Here we have identified a 190 base pair enhancer that is highly conserved in teleosts and  
460 is both necessary and sufficient for tooth and fin expression of stickleback *Bmp6*. Site-directed  
461 mutagenesis of a predicted Smad3 binding site and pharmacological experiments suggest this  
462 enhancer is TGF $\beta$ -responsive. Though this enhancer drives expression in several of *Bmp6*'s  
463 endogenous domains, our results suggest that like other *Bmp* genes, stickleback *Bmp6* contains a  
464 complex *cis*-regulatory architecture composed of multiple modules driving expression in  
465 different domains. We detected embryonic expression domains of *Bmp6* by *in situ* hybridization,  
466 such as the eye, ear, diencephalon, and notochord, that were not observed in the BAC reporter

467 line, suggesting that the regulatory elements controlling these domains lie outside of the 180 kb  
468 of stickleback DNA included in the BAC. Furthermore, while TALEN mutations severely  
469 reduced expression in the fins and teeth, every BAC reporter fish injected with TALENs had  
470 GFP expression in the heart, suggesting that the enhancer is not required for heart expression.  
471 Thus, the short enhancer presented here contributes to a subset of the endogenous *Bmp6*  
472 expression domains, with other domains likely driven by other enhancers greater than ~100 kb  
473 away. Evidence for long range distant enhancers of stickleback *Bmp6* is expected, given the  
474 frequent finding of long distance regulatory elements for developmental regulatory genes,  
475 including other vertebrate *Bmp* genes (reviewed in Preziger and Mortlock, 2009). Interestingly,  
476 despite the presence of redundant “shadow” enhancers found in many genes (Calle-Mustienes et  
477 al., 2005; Marinić et al., 2013; Perry et al., 2010), this enhancer appears to be required for several  
478 *Bmp6* expression domains; additional enhancers did not appear to sufficiently compensate in  
479 driving *Bmp6* expression when the 5’ enhancer was targeted with TALENs.

480 Another teleost tooth/fin enhancer has been described with overall similar expression  
481 patterns observed in this *Bmp6* enhancer. In zebrafish, an FGF-responsive enhancer mediates  
482 *Dlx2* expression in teeth and median and pectoral fins (Jackman and Stock, 2006). Additionally,  
483 in mice, a *Bmp4* enhancer drives tooth epithelium and limb bud expression by responding to Pitx  
484 and Msx homeodomains (Jumlongras et al., 2012). The shared fin/limb and tooth expression  
485 domains of these *cis*-regulatory elements and the one described here suggest that fin and tooth  
486 development share multiple *cis*-regulatory networks, with at least three signaling pathways  
487 (FGF, Pitx/Msx, and TGFβ) involved in generating similar gene expression readouts in teeth and  
488 fins/limbs. Gene expression patterns of paired fins are thought to be co-opted from median fin  
489 expression domains in agnathans (Freitas et al., 2006). The *Bmp6* enhancer presented here

490 appears to be teleost-specific, as we did not find evidence of this conserved enhancer sequence in  
491 the genomes of lamprey, elephant shark, or spotted gar. Thus, our results suggest that teleosts  
492 may have secondarily coopted components of a gene regulatory network in developing median  
493 and pectoral fins and teeth.

494         Elucidating the *cis*-regulatory architecture of stickleback *Bmp6* and evolved changes in  
495 *Bmp6*'s *cis*-regulatory architecture will help test the hypothesis that evolved changes in *Bmp6*  
496 *cis*-regulation underlie the evolved increases in freshwater stickleback tooth number we  
497 previously described (Cleves et al., 2014). Although the 190 bp core *Bmp6* enhancer presented  
498 here contains no nucleotide differences between low-toothed marine and high-toothed freshwater  
499 sticklebacks, several nucleotide differences exist in the sequence flanking the enhancer, which  
500 might contribute to the *cis*-regulatory differences observed between marine and freshwater  
501 alleles of *Bmp6*. Future studies will focus on whether these differences result in differential *cis*-  
502 regulatory activity between the marine and freshwater alleles of *Bmp6*.

503

#### 504 **Conservation and turnover of *cis*- and *trans*-regulatory information**

505         It has been proposed that the *cis*-regulatory architecture of developmental control genes  
506 often consist of multiple independent modules, each of which drives expression in a particular  
507 tissue or cell type (Carroll, 2008; Stern, 2000). Because the *Bmp6* enhancer drives multiple  
508 anatomical expression domains and is only partially conserved to zebrafish, we hypothesized that  
509 domains may have been sequentially added to the enhancer during teleost evolution, and that the  
510 different anatomical domains would be separable. Contrary to these predictions, our site directed  
511 mutagenesis and subcloning experiments of the stickleback *Bmp6* enhancer appeared to affect all  
512 or none of the different expression domains, suggesting the different anatomical domains might

513 not be separable and instead reflect ability to respond to a signal or signals present in multiple  
514 tissues.

515         Furthermore, enhancers from all four teleost species tested were sufficient to drive fin  
516 and tooth expression in zebrafish. However, the zebrafish enhancer, the most evolutionary  
517 divergent enhancer tested in this study, did not function robustly in sticklebacks, suggesting that  
518 the *trans* factors driving expression might have changed during the divergence of the two  
519 species. Similarly, testing a zebrafish *Dlx2* tooth and fin enhancer in both zebrafish and Mexican  
520 tetra revealed that loss of oral *Dlx2* expression in zebrafish is caused by changes in *trans* factors,  
521 as the *Dlx2* zebrafish tooth enhancer is active in tetra oral teeth (Jackman and Stock, 2006). In  
522 both *C. elegans* and *Drosophila*, transgenic testing of *cis*-regulatory elements from two fly or  
523 worm species in both fly or worm species revealed that the greater the evolutionary distance  
524 separating two regulatory elements, the more likely upstream *trans* differences are to have  
525 evolved (Gordon and Ruvinsky, 2012). But, subtle changes in *trans*-acting factors can maintain  
526 similar expression patterns despite *cis* changes in divergent lineages (Barrière et al., 2012). Our  
527 results suggest a combination of conservation and divergence of *trans* factors, as stickleback  
528 sequence worked robustly in zebrafish, but zebrafish sequence was not functional in stickleback.  
529 Additionally, SB431542 treatment affected the stickleback enhancer in zebrafish more severely  
530 than in stickleback. Even at a low dose of SB431542 (25  $\mu$ M), the enhancer was completely shut  
531 off in both epithelia and mesenchyme of zebrafish teeth (see Fig. 4E-F). This result supports  
532 potential *trans* regulatory divergence between stickleback and zebrafish, because it suggests that  
533 the enhancer's expression may be more sensitive to TGF $\beta$  signaling in zebrafish than in  
534 stickleback.

535



536 **A role for TGF $\beta$  in the regulation of BMPs**

537 To our knowledge, this study is the first to support a role for TGF $\beta$  signaling in  
538 controlling Bmp signaling via a *cis*-regulatory input. Conditional deletion of *Tgfb1* (*Alk5*) in  
539 mouse neural crest lineages results in reduced expression of *Bmp4* and delayed tooth initiation  
540 (Zhao et al., 2008); however, the mechanism of this interaction has not been described. Other  
541 studies have shown both positive and negative correlations between *Bmp6* expression and TGF $\beta$   
542 levels: *Smad3* *-/-* chondrocytes have reduced *Bmp6* expression (Li et al., 2006), whereas *Bmp6*  
543 expression is increased in *Smad3* *-/-* tendons undergoing tissue repair (Katzel et al., 2011). Our  
544 data suggest that in sticklebacks, TGF $\beta$  signaling activates *Bmp6* expression in multiple tissues  
545 via a predicted Smad3 binding site. In teeth, blocking TGF $\beta$  signaling using the inhibitor  
546 SB431542 caused loss of epithelial reporter expression, but the effect on the mesenchymal  
547 expression was less severe (Fig. 4C, Fig. 5). The same pattern was observed in endogenous  
548 *Bmp6* expression (Fig. 6O). This result suggests that epithelial and mesenchymal *Bmp6*  
549 expression domains respond to partially different signaling pathways, with epithelial expression  
550 much more sensitive to TGF $\beta$  disruption.

551 We observed that a higher dose of TGF $\beta$  inhibitor SB431542 was required to shut off  
552 endogenous *Bmp6* expression relative to expression driven solely by the 190bp enhancer. While  
553 a 50  $\mu$ M treatment almost completely eliminated enhancer expression (Fig. 4), at this dose we  
554 did not observe a strong difference in GFP expression driven by the reporter BAC. Only at the  
555 higher dose of 100  $\mu$ M did we observe a change in BAC reporter expression and endogenous  
556 *Bmp6* expression (Fig. 7). This finding suggests that in its native genomic context, the enhancer  
557 may be less sensitive to TGF $\beta$  signaling perturbations than when it is isolated in a reporter  
558 construct. There may be additional non-TGF $\beta$  regulatory elements that drive *Bmp6* expression in

559 the same tooth and fin domains such that a decrease in TGF $\beta$  signaling has a less obvious effect  
560 at lower doses. Furthermore, the effect of SB431542 treatment on endogenous *Bmp6* expression  
561 and BAC reporter expression was not as dramatic as deletion of the Smad3 binding site with  
562 TALENs (compare Fig. 6 to Fig. 7). This finding suggests that other non-TGF $\beta$  factors may bind  
563 sequences immediately surrounding the Smad3 binding site to drive enhancer expression.  
564 However, the predicted Smad3 site is absolutely required, as loss of this site completely  
565 eliminates enhancer activity (Fig. 4J).

566

### 567 **Combined effects of Wnt and TGF $\beta$ on tooth development**

568 Although our site-directed mutagenesis experiment indicated that TCF/Lef predicted  
569 binding sites might be important for enhancer function (Fig. 3), pharmacological testing with  
570 XAV939 did not support the hypothesis that the enhancer requires Wnt signaling inputs for  
571 enhancer function. A stable line of zebrafish containing the TCF/Lef mutated reporter also drove  
572 robust reporter expression in fins and teeth, providing a second piece of evidence that the  
573 enhancer does not require Wnt input. This result was somewhat surprising, as the expression  
574 domains driven by the *Bmp6* enhancer are similar to a TCF reporter zebrafish line (Shimizu et  
575 al., 2012). The reduction in activity seen from mutating the TCF/Lef sites may have been caused  
576 by other unknown binding sites overlapping the mutated base pairs, by inadvertently creating  
577 repressive motifs, or by somehow altering the binding of the Smad3 complex. The mutations  
578 may have affected the level, but not pattern, of GFP expression, making the construct appear less  
579 robust in our transient transgenic assay. We did note that combined treatment with XAV939 and  
580 SB431542 caused a slight decrease in mesenchymal tooth GFP expression (see insets of Fig. 5),

581 however, this effect was less reproducible than the complete loss of epithelial expression seen  
582 upon SB431542 treatment alone.

583         The combination treatment with SB431542 and XAV939 did reduce tooth number in  
584 sticklebacks, suggesting that Wnt and TGF $\beta$  signaling pathways together are required for  
585 maintaining normal tooth development and patterning. In mice, as well as in diphyodont humans  
586 and polyphyodonts including snakes and alligators, Wnt signaling is required for tooth formation  
587 and replacement (Adaimy et al., 2007; Bohring et al., 2009; Gaete and Tucker, 2013; Genderen  
588 et al., 1994; Liu et al., 2008; Wu et al., 2013). In mice, TGF $\beta$  signaling is also required for tooth  
589 development (Ferguson et al., 1998, 2001; Oka et al., 2007). Antisense abrogation of both  
590 *TGFB2* and *TGFBRII* in cultured mandibles resulted in accelerated tooth formation (Chai et al.,  
591 1994, 1999), however the *TGFB2* knockout mouse has no reported tooth phenotype (Sanford et  
592 al., 1997). While the *TGFBRII* knockout dies prior to tooth formation (Oshima et al., 1996),  
593 conditional ablation in neural crest cells prevents terminal differentiation of odontoblasts (Oka et  
594 al., 2007), while conditional ablation in *Osx*-expressing odontoblasts revealed a necessary role  
595 for *TGFBRII* in molar root development (Wang et al., 2013). Furthermore, Wnt and TGF $\beta$   
596 signaling are required to activate *Eda* and *Edar* in appropriate patterns in the developing tooth  
597 germs (Laurikkala et al., 2001). However, to our knowledge, this study is the first to show a  
598 partially redundant requirement for TGF $\beta$  and Wnt during tooth development, as only XAV939  
599 and SB431542 doubly treated fish had reduced tooth numbers. Future studies of this enhancer  
600 will further test the hypothesis that this enhancer responds to TGF $\beta$  signaling to control *Bmp6*  
601 expression during tooth and fin development.

602

603 **Conclusions**

604           We have identified a 190 base pair conserved enhancer required for tooth, fin, and other  
605 expression domains of stickleback *Bmp6*. Site directed mutagenesis and pharmacology  
606 experiments support the hypothesis that this enhancer responds to TGF $\beta$  signaling via a Smad3  
607 binding site. Expression driven by this enhancer in tooth epithelial cells appears more sensitive  
608 to TGF $\beta$  levels than expression in tooth mesenchymal cells. To our knowledge, this is the first  
609 demonstration of a likely *cis*-regulatory link between TGF $\beta$  signaling and *Bmp* expression in  
610 teeth. *In vivo* deletion of this enhancer using TALENs caused severe disruption of *Bmp6*  
611 expression in fins and tooth epithelia, suggesting this enhancer is required for normal expression  
612 patterns in a subset of *Bmp6*'s endogenous domains. Finally, we demonstrate that a combination  
613 of TGF $\beta$  signaling and Wnt signaling is required for normal tooth development in sticklebacks.

614

#### 615 **Acknowledgements**

616           This work was supported by NIH R01 #DE021475. We thank David Kingsley for support  
617 and advice on BAC isolation, Tim Howes and David Kingsley for the generous gift of the  
618 Tol2/*hsp70* backbone, Daniel Schlenk and Anita Kuepper for providing medaka specimens,  
619 Natasha Naidoo for assistance in cloning the medaka reporter construct, and Lisa Kronstad for  
620 providing the site-directed mutagenesis protocol.

621

622 **Figure Legends**

623

624 **Fig. 1. A conserved 190 bp enhancer upstream of *Bmp6* drives gene expression in several**

625 **domains.** (A) The 5' region of stickleback *Bmp6* from the UCSC genome browser

626 (<http://genome.ucsc.edu/>). The region of genomic DNA used in the 2.8 kb enhancer construct

627 (see Fig. S3) is shown in green, conserved sequences (CS) 1-3 are shown in purple, and the

628 subcloned 190bp enhancer is shown in yellow. The first exon and part of the first intron of *Bmp6*

629 are shown in thick and thin black lines, respectively (bottom). Conservation peaks and

630 alignments (dark blue and grey) are shown from the 8-Species MultiZ track. (B) Zoom in on the

631 middle of CS1, approximately 2.5 kb upstream of the predicted *Bmp6* transcription start site. The

632 190 bp enhancer, the 72 bp minimal enhancer (see Fig. S6), and a predicted Smad3 binding site

633 (see Fig. 3-4) are shown in yellow, pink, and blue, respectively. The conservation track is shown

634 as dark blue peaks, above green alignments showing conservation to medaka, tetraodon, fugu,

635 and zebrafish, from top to bottom. (C) GFP reporter expression pattern driven by the 190 bp

636 enhancer in a 5 dpf (stage 22, (Swarup, 1958)) stickleback embryo. Strong expression was seen

637 in the distal edge of the developing pectoral fin (arrow), the heart (asterisk), and the distal edge

638 of the median fin (arrowhead). (D) Confocal projection of GFP reporter expression in the ventral

639 pharyngeal tooth plate in a ~10 mm stickleback fry. Expression was observed in the epithelium

640 of developing tooth germs (arrow) and the odontogenic mesenchyme (arrowhead) in the cores of

641 ossified teeth. Bones are fluorescently stained with Alizarin red. (E) GFP reporter expression in

642 the oral teeth (arrow) of a 30 dpf stickleback fry. GFP in the lens is an internal control for the

643 zebrafish *hsp70* promoter used in the transgenic construct. Scale bars = 200  $\mu$ m.

644

645 **Fig. 2. Evolutionary functional conservation of the *Bmp6* enhancer in teleosts.** (A) Sequence  
646 alignments of four teleost sequences relative to the 190 bp stickleback enhancer. The perfectly  
647 conserved Smad3 dimer binding site is marked in blue, and purple arrows mark the boundaries of  
648 the 72 bp minimal enhancer (see Fig. S6). (B-D) The stickleback sequence reporter construct  
649 stably integrated into the zebrafish genome drove expression in the distal edge of the median fin  
650 at 24 hpf (arrow in B), the distal edge of the pectoral fin at 48 hpf (arrow in C), and tooth  
651 epithelium (arrow) and mesenchyme (arrowhead) at 5 dpf (D). (E-G) A 477 bp construct of  
652 zebrafish genomic sequence centered around the conserved sequence of the enhancer drove  
653 similar, but weaker expression in the median fin of a 33 hpf zebrafish (arrow in E), pectoral fins  
654 of a 48 hpf zebrafish (inset of F), and teeth of a 5 dpf zebrafish (G). (H-I) Although not detected  
655 in seven of eight stable lines, in one of eight stable lines, the zebrafish sequence drove faint  
656 expression in the distal edges of the median fin (arrow in H) and pectoral fins (arrow in J) of 5  
657 dpf stickleback. However, no expression was detected in tooth germs in newly hatched fry in any  
658 line (J). See Table S2 for quantification of expression domains of transgenic lines. Bone is  
659 fluorescently stained with Alizarin red in (D, G, J). Scale bars = 200  $\mu$ m.

660

661 **Fig. 3. Mutations in predicted Smad3 binding sites severely reduce enhancer function.** (A)  
662 Binding sites predicted by UniProbe and PROMO are highlighted with a unique color for each  
663 signaling pathway. Highlighted sequences represent the “predicted sequence” from PROMO or  
664 the “K-mer” from UniProbe. Mutated base pairs are shown with lowercase letters. Nucleotide  
665 positions conserved to zebrafish are indicated with an asterisk, and arrows indicate the 72 bp  
666 minimal enhancer sequence. (B-C) Sticklebacks were injected with each mutated construct and  
667 scored for pectoral fin and/or median fin expression at 5 dpf (B) and oral and/or pharyngeal tooth

668 expression at 12-13 dpf (C). Frequency of expression in these domains is shown as a percentage  
669 of the total number of GFP-positive fish (scored as GFP expression driven by the *hsp70*  
670 promoter anywhere at 5 dpf or in the lens at 12-13 dpf) on the y-axis.

671

672 **Fig. 4. Pharmacological disruption of TGF $\beta$  signaling or TALEN-induced mutations of the**  
673 **predicted Smad3 binding site reduce enhancer activity.** (A-C) Treatment of stickleback fry  
674 for 7 days in SB431542 (an ALK5 inhibitor) severely reduced GFP expression driven by the 190  
675 bp enhancer in a dose-dependent manner. Expression was severely reduced in the epithelia  
676 (arrows), but not mesenchyme (asterisks), of pharyngeal teeth at both low (25  $\mu$ M, B) and high  
677 (50  $\mu$ M, C) doses relative to controls (A). (D-F) SB431542 also eliminated GFP driven by the  
678 stickleback enhancer in a zebrafish *trans* environment. (G) The sequence targeted by TALENs  
679 contains a predicted Smad3 homodimer binding site (blue). The TALEN binding sites are  
680 indicated in purple text and the purple scissors indicate the approximate site of endonuclease  
681 activity. The XbaI site used for molecular screening is underlined in green, and the mutagenized  
682 sequence of the Smad3 binding site, indicated by orange letters, is shown below. (H-I) Injection  
683 of the TALENs into stable transgenic fish carrying the 190 bp reporter construct resulted in near  
684 complete loss of GFP expression in 95% of injected animals (I) relative to controls (H). Residual  
685 GFP seen in (I) is likely the result of the mosaicism of TALEN-induced lesions. (J). Mutating the  
686 predicted Smad3 binding site resulted in a loss of GFP expression in both epithelium and  
687 mesenchyme of pharyngeal teeth in 3/3 stickleback lines observed. Bone is fluorescently  
688 counterstained with Alizarin red. Scale bars = 200  $\mu$ m.

689

690 **Fig. 5. Wnt signaling is not required for enhancer function, but Wnt and TGF $\beta$  are**  
691 **required for tooth development.** Newly hatched stickleback fry were treated with DMSO  
692 (control, A), SB431542 (B-C), XAV939 (D-E), or a combination of the two drugs at low (25 $\mu$ M  
693 for SB431542 and 5  $\mu$ M for XAV939, F) or high (50  $\mu$ M for SB431542 or 10  $\mu$ M XAV939, G)  
694 doses for 5 days. Main panels show Alizarin red and GFP for the ventral tooth plate; insets show  
695 GFP only for mesenchyme of a single tooth from the dorsal tooth plate. (B, C) SB431542  
696 reduced GFP in tooth epithelia (arrows) relative to control (A, and see Fig. 3). However,  
697 mesenchymal GFP (arrowhead, inset) was less severely reduced. (D, E) XAV939 alone did not  
698 affect GFP expression in epithelia (arrows) or mesenchyme (arrowheads) at either dose. (F, G)  
699 No strong additional effect on GFP expression was seen when XAV939 and SB431542 were  
700 combined, though mesenchymal GFP appeared slightly lower in the combined dose. (H) A  
701 combination of SB431542 and XAV939 significantly reduced ventral pharyngeal tooth number.  
702 (I) Treatment with SB431542, but not XAV939, decreased the number of green tooth epithelia  
703 relative to total ventral teeth (ratio is expressed as a decimal). XAV939 had no additional effect  
704 on green epithelia in combination with SB431542. Tukey HSD P-values of relevant comparisons  
705 are shown above with asterisks (\*=P<0.05, \*\* =P<0.0005, n.s.=P>0.05). Scale bars = 200  $\mu$ m  
706

707 **Fig. 6. The 5' 190bp enhancer is necessary for *Bmp6* expression.** (A) Schematic of the  
708 genomic location of the 180 kb CHORI BAC29E12 with respect to *Bmp6* and nearby genes  
709 (coding regions shown in black are *Ipo4*, *Pdcd6*, *Txndc5*, *Muted*, *Eef1e1*, and *Slc35b3* from left  
710 to right). (B) Recombineering strategy for introducing GFP into the first exon of *Bmp6*; grey bars  
711 indicate exons. (C) Final circular BAC with inverted Tol2 sites for transposition and GFP  
712 reporter (not to scale). (D) Strategy for introducing TALEN lesions into the 190 bp 5' enhancer.



713 The same TALENs were used to target the enhancer in stable transgenic BAC fish and at the  
714 endogenous *Bmp6* locus (diagram not to scale). (E) Sequences of stable mutant enhancer alleles.  
715 For the endogenous locus targeting, F2 fish trans-heterozygous for two different enhancer  
716 mutations were generated. Fish in (M) carried alleles 1 and 2; fish in (O) and (Q) carried alleles 1  
717 and 3. The predicted Smad3 binding site is indicated with blue text in the wild type sequence. (F,  
718 G) In the reporter BAC, TALEN injection frequently severely reduced GFP expression from the  
719 pectoral fin relative to controls at 5 dpf. A small patch of mosaic, unaffected GFP is indicated  
720 with the arrow in (G). (H, I) TALEN injection also eliminated much of the *Bmp6* tooth  
721 expression (I). (J, K) GFP expression was also reduced in gills (asterisk) and slightly reduced in  
722 the gill rakers (arrowhead). (L-M). Mutations in the enhancer caused a reduction in pectoral fin  
723 *Bmp6* expression relative to wild-type siblings. (N, O) *Bmp6* expression was also lost in tooth  
724 epithelia (arrows), but was not entirely lost in mesenchyme (arrowheads). (P, Q) Expression was  
725 also noticeably reduced in gills (asterisk), though gill raker expression (arrows) appears similar  
726 to wild-type sibling controls. Scale bars = 100  $\mu$ m.

727

728 **Fig. 7. Treatment with TGF $\beta$  inhibitor SB431542 reduces *Bmp6* expression.** (A-D) Newly  
729 hatched stickleback were treated with 100  $\mu$ M SB431542 or DMSO vehicle control for 5 days,  
730 and *Bmp6* expression was assayed by *in situ* hybridization. Drug treatment severely reduced  
731 *Bmp6* expression in fins (A, B) and also reduced *Bmp6* expression in tooth epithelia (C, D).  
732 Likewise, GFP driven by the *Bmp6* locus in the reporter BAC was also reduced in fins  
733 (arrowheads in E, F) and teeth (G, H) after SB431542 treatment. Scale bars = 100  $\mu$ m.

734

735 **Supplementary Figure and Table Legends**

736 **Fig. S1. Domains of GFP expression in a stickleback *Bmp6* BAC reporter.**

737 The first exon of *Bmp6* was replaced with GFP in a 180 kb stickleback BAC (see Fig. 6). Stable  
738 lines carrying this reporter construct displayed GFP expression in a variety of tissues. Expression  
739 was detected in the distal edge of the forming median caudal fin (A) and ventrolateral cells  
740 surrounding the heart and pharyngeal region (B) at 3 dpf when viewed laterally. At 5 dpf,  
741 expression was observed in cells in the distal edge of the median fin (arrow in C, arrowhead  
742 points to autofluorescent pigment cell) and the distal edge of the developing pectoral fins (arrows  
743 in D). Soon after hatching (at 11-12 dpf), expression was observed in pharyngeal (E) and oral (F,  
744 ventral view) teeth. Additionally, GFP<sup>+</sup> cells were observed surrounding the branchiostegal rays  
745 (G), opercle (H), and gill rakers (arrow I). Cells in the soft tissue of the gill buds were also seen  
746 (asterisk in I). GFP was also observed in cells surrounding the heart (asterisk in J, ventral view  
747 and K, lateral view). Bone is fluorescently counterstained with Alizarin red in E-G. Scale bars =  
748 200  $\mu$ m (A-D); 100  $\mu$ m (E-K).

749

750 **Fig. S2. Expression domains of stickleback *Bmp6*.** *Bmp6* expression was assayed by whole

751 mount *in situ* hybridization at 3 dpf (A, B), 5 dpf (C-H), and 12 dpf (I-K). Expression was  
752 observed in the forming median fin in the tailbud (A, C), heart (lateral view in B), eyes and ears  
753 (asterisk) (D), distal edge of the developing pectoral fins (E), dorsal medial diencephalon (F),  
754 notochord and dorsal neural tube (G), hindgut and cloaca (H), gill rakers and gill buds (arrow  
755 and asterisk in I), branchiostegal rays (J), and pharyngeal teeth (K). Scale bars = 200  $\mu$ m (A-E);  
756 50  $\mu$ m (F-K).

757

758 **Fig. S3. Expression driven by 2.8 kb of genomic sequence upstream of *Bmp6*.** During early  
759 development, the 2.8 kb reporter construct drove expression in the forming median fin in the  
760 tailbud at 3 dpf (A), cells in the developing heart and pharyngeal pouches at 4 dpf (B), the distal  
761 edge of the median (C) and pectoral (D) fins at 5 dpf. After hatching (11-14 dpf), additional  
762 expression was observed in pharyngeal teeth (E), pericardial cells (F), the developing gills (G),  
763 oral teeth (H), the scapulocoracoid cartilage (I), and the distal edge of the opercle (J). In fry (22-  
764 30 dpf), expression was observed in the distal tips of fin rays (K) and the developing pelvic spine  
765 (arrow) and kidney (asterisk) (L). Red in E, G-K is Alizarin red counterstaining of bone, and  
766 yellow spots in H-J are autofluorescent pigment cells. Scale bars = 200  $\mu\text{m}$  (A-D); 100  $\mu\text{m}$  (E-H,  
767 J, K); 500  $\mu\text{m}$  (I, L).

768

769 **Fig. S4. Enhancer GFP and *Bmp6* expression are detected in the inner but not outer dental**  
770 **epithelium.** (A-C) GFP expression driven by the reporter BAC (A), 2.8 kb reporter construct  
771 (B), and 190bp reporter construct (C) was limited to the inner dental epithelium (IDE) as  
772 visualized under differential interference contrast optics. (D) *Bmp6* mRNA expression was also  
773 restricted to the IDE as previously reported (Cleves et al 2014). The outer dental epithelium  
774 (ODE) is indicated with white arrows in A-D. (E-H) Images from A-D with the the outer edge of  
775 the ODE traced with white dashed lines and the outer edge of the IDE traced with black dashed  
776 lines. Scale bars = 100  $\mu\text{m}$ .

777

778 **Fig. S5. Atlantic cod and medaka enhancers drive fin and tooth expression in both**  
779 **stickleback and zebrafish.** Orthologous *Bmp6* enhancer sequences from two species from  
780 clades that evolved between zebrafish and sticklebacks, medaka and Atlantic cod, drove similar

781 expression patterns in stickleback (A-D) and zebrafish (E-H). Expression was observed in the  
782 distal edges of the pectoral fins (arrows) at 5 dpf in stickleback (A, C) or 48-56 hpf zebrafish (E,  
783 G). Later in development, pharyngeal tooth expression was observed at 20 dpf in stickleback (B,  
784 D) or 5 dpf zebrafish (F, H). Bright neural expression in (C) was not seen in other lines and was  
785 likely an artifact of the transgene integration site. Scale bars = 200  $\mu$ m.

786

787 **Fig. S6. 72bp of conserved stickleback genomic sequence is sufficient for enhancer domains**  
788 **but increases heart expression.** The minimally sufficient 72 bp construct drove expression in  
789 (A) mesenchyme (arrowhead) and epithelium (arrow) of a 5 dpf zebrafish ventral tooth plate, (B)  
790 the distal edge of the median fin in a 24 hpf zebrafish and (C) the distal edge of the pectoral fin  
791 (arrow) in a 48 hpf zebrafish. The intensity of heart expression was noticeably increased  
792 (asterisk, compare to Fig. 2C), suggesting that the shortened sequence had lost some repressor  
793 activity. Scale bars = 100  $\mu$ m (A); 200  $\mu$ m (B-C).

794

795 **Fig. S7. Mutation of Smad3 but not TCF/Lef predicted binding sites affects reporter**  
796 **expression in zebrafish.** Zebrafish stable lines were obtained for two constructs that appeared to  
797 show reduced activity in sticklebacks. (A-C) The wild-type 190 bp stickleback enhancer drove  
798 expression in the distal edge of the median fin (A), distal edge of the pectoral fin (B) and  
799 pharyngeal teeth (C) of zebrafish. Images in A-C are the same as in Fig. 2 for comparison with  
800 D-J. (D-F) The TCF/Lef mutated construct showed expression in the median fin at 24 hpf (arrow  
801 in D), pectoral fin at 48 hpf (arrow in E), and pharyngeal teeth at 5 dpf (F) in all lines observed.  
802 Brain expression in E was not typical and is likely an artifact of the transgene integration site.  
803 (G-I) In nearly all (8/9) lines observed, the Smad3 mutated construct lacked expression in the

804 median fin (arrow in G), pectoral fin (arrow in H), and teeth (I). One of 9 lines had very faint  
805 expression in these domains. Scale bars = 200  $\mu$ m.

806

807 **Fig. S8. SB431542 reduces reporter GFP expression in the median and pectoral fins in both**  
808 **sticklebacks and zebrafish.** Treatment with 50  $\mu$ M SB431542 reduced, but did not completely  
809 eliminate, GFP reporter expression driven by the 190 bp enhancer relative to vehicle (DMSO)  
810 controls in the pectoral fins (A, B, E, F) and median fins (C, D, H, G) of both stickleback (A-D)  
811 and zebrafish (E-H) embryos. Scale bars = 400  $\mu$ m.

812 **References:**

- 813 Aberg, T., Wozney, J., and Thesleff, I. (1997). Expression patterns of bone morphogenetic  
814 proteins (Bmps) in the developing mouse tooth suggest roles in morphogenesis and cell  
815 differentiation. *Dev. Dyn. Off. Publ. Am. Assoc. Anat.* *210*, 383–396.
- 816 Abzhanov, A., Protas, M., Grant, B.R., Grant, P.R., and Tabin, C.J. (2004). Bmp4 and  
817 morphological variation of beaks in Darwin’s finches. *Science* *305*, 1462–1465.
- 818 Adaimy, L., Chouery, E., Mégarbané, H., Mroueh, S., Delague, V., Nicolas, E., Belguith, H., de  
819 Mazancourt, P., and Mégarbané, A. (2007). Mutation in WNT10A Is Associated with an  
820 Autosomal Recessive Ectodermal Dysplasia: The Odonto-onycho-dermal Dysplasia. *Am. J.*  
821 *Hum. Genet.* *81*, 821–828.
- 822 Adams, D., Karolak, M., Robertson, E., and Oxburgh, L. (2007). Control of kidney, eye and  
823 limb expression of Bmp7 by an enhancer element highly conserved between species. *Dev.*  
824 *Biol.* *311*, 679–690.
- 825 Albertson, R.C., Streelman, J.T., Kocher, T.D., and Yelick, P.C. (2005). Integration and  
826 evolution of the cichlid mandible: The molecular basis of alternate feeding strategies. *Proc.*  
827 *Natl. Acad. Sci. U. S. A.* *102*, 16287–16292.
- 828 Andl, T., Ahn, K., Kairo, A., Chu, E.Y., Wine-Lee, L., Reddy, S.T., Croft, N.J., Cebra-Thomas, J.A.,  
829 Metzger, D., Chambon, P., et al. (2004). Epithelial Bmpr1a regulates differentiation and  
830 proliferation in postnatal hair follicles and is essential for tooth development. *Dev. Camb.*  
831 *Engl.* *131*, 2257–2268.
- 832 Andriopoulos, B., Corradini, E., Xia, Y., Faasse, S.A., Chen, S., Grgurevic, L., Knutson, M.D.,  
833 Pietrangelo, A., Vukicevic, S., Lin, H.Y., et al. (2009). BMP6 is a key endogenous regulator of  
834 hepcidin expression and iron metabolism. *Nat. Genet.* *41*, 482–487.
- 835 Barrière, A., Gordon, K.L., and Ruvinsky, I. (2012). Coevolution within and between  
836 Regulatory Loci Can Preserve Promoter Function Despite Evolutionary Rate Acceleration.  
837 *PLoS Genet* *8*, e1002961.
- 838 Bei, M., and Maas, R. (1998). FGFs and BMP4 induce both Msx1-independent and Msx1-  
839 dependent signaling pathways in early tooth. *Development* *125*, 4325–4333.
- 840 Bellusci, S., Henderson, R., Winnier, G., Oikawa, T., and Hogan, B.L. (1996). Evidence from  
841 normal expression and targeted misexpression that bone morphogenetic protein (Bmp-4)  
842 plays a role in mouse embryonic lung morphogenesis. *Development* *122*, 1693–1702.
- 843 Biggs, L.C., and Mikkola, M.L. (2014). Early inductive events in ectodermal appendage  
844 morphogenesis. *Semin. Cell Dev. Biol.* *25–26*, 11–21.
- 845 Bohring, A., Stamm, T., Spaich, C., Haase, C., Spree, K., Hehr, U., Hoffmann, M., Ledig, S., Sel, S.,  
846 Wieacker, P., et al. (2009). WNT10A Mutations Are a Frequent Cause of a Broad Spectrum

847 of Ectodermal Dysplasias with Sex-Biased Manifestation Pattern in Heterozygotes. *Am. J.*  
848 *Hum. Genet.* *85*, 97–105.

849 Botchkarev, V.A., Botchkareva, N.V., Roth, W., Nakamura, M., Chen, L.H., Herzog, W., Lindner,  
850 G., McMahon, J.A., Peters, C., Lauster, R., et al. (1999). Noggin is a mesenchymally derived  
851 stimulator of hair-follicle induction. *Nat. Cell Biol.* *1*, 158–164.

852 Calle-Mustienes, E. de la, Feijóo, C.G., Manzanares, M., Tena, J.J., Rodríguez-Seguel, E., Letizia,  
853 A., Allende, M.L., and Gómez-Skarmeta, J.L. (2005). A functional survey of the enhancer  
854 activity of conserved non-coding sequences from vertebrate Iroquois cluster gene deserts.  
855 *Genome Res.* *15*, 1061–1072.

856 Carroll, S.B. (2008). Evo-Devo and an Expanding Evolutionary Synthesis: A Genetic Theory  
857 of Morphological Evolution. *Cell* *134*, 25–36.

858 Cermak, T., Doyle, E.L., Christian, M., Wang, L., Zhang, Y., Schmidt, C., Baller, J.A., Somia, N.V.,  
859 Bogdanove, A.J., and Voytas, D.F. (2011). Efficient design and assembly of custom TALEN  
860 and other TAL effector-based constructs for DNA targeting. *Nucleic Acids Res.* gkr218.

861 Chai, Y., Mah, A., Crohin, C., Groff, S., Bringas, P., Le, T., Santos, V., and Slavkin, H.C. (1994).  
862 Specific transforming growth factor-beta subtypes regulate embryonic mouse Meckel's  
863 cartilage and tooth development. *Dev. Biol.* *162*, 85–103.

864 Chai, Y., Zhao, J., Mogharei, A., Xu, B., Bringas Jr., P., Shuler, C., and Warburton, D. (1999).  
865 Inhibition of transforming growth factor- $\beta$  type II receptor signaling accelerates tooth  
866 formation in mouse first branchial arch explants. *Mech. Dev.* *86*, 63–74.

867 Chandler, R.L., Chandler, K.J., McFarland, K.A., and Mortlock, D.P. (2007). Bmp2  
868 Transcription in Osteoblast Progenitors Is Regulated by a Distant 3' Enhancer Located  
869 156.3 Kilobases from the Promoter. *Mol. Cell. Biol.* *27*, 2934–2951.

870 Chen, Y., Bei, M., Woo, I., Satokata, I., and Maas, R. (1996). Msx1 controls inductive signaling  
871 in mammalian tooth morphogenesis. *Development* *122*, 3035–3044.

872 Cleves, P.A., Ellis, N.A., Jimenez, M.T., Nunez, S.M., Schluter, D., Kingsley, D.M., and Miller, C.T.  
873 (2014). Evolved tooth gain in sticklebacks is associated with a cis-regulatory allele of  
874 Bmp6. *Proc. Natl. Acad. Sci.* *111*, 13912–13917.

875 Dassule, H.R., and McMahon, A.P. (1998). Analysis of Epithelial–Mesenchymal Interactions  
876 in the Initial Morphogenesis of the Mammalian Tooth. *Dev. Biol.* *202*, 215–227.

877 Dathe, K., Kjaer, K.W., Brehm, A., Meinecke, P., Nürnberg, P., Neto, J.C., Brunoni, D.,  
878 Tommerup, N., Ott, C.E., Klopocki, E., et al. (2009). Duplications Involving a Conserved  
879 Regulatory Element Downstream of BMP2 Are Associated with Brachydactyly Type A2. *Am.*  
880 *J. Hum. Genet.* *84*, 483–492.

881 Dendooven, A., van Oostrom, O., van der Giezen, D.M., Willem Leeuwis, J., Snijckers, C., Joles,  
882 J.A., Robertson, E.J., Verhaar, M.C., Nguyen, T.Q., and Goldschmeding, R. (2011). Loss of  
883 Endogenous Bone Morphogenetic Protein-6 Aggravates Renal Fibrosis. *Am. J. Pathol.* *178*,  
884 1069–1079.

885 Doyle, E.L., Booher, N.J., Standage, D.S., Voytas, D.F., Brendel, V.P., VanDyk, J.K., and  
886 Bogdanove, A.J. (2012). TAL Effector-Nucleotide Targeter (TALE-NT) 2.0: tools for TAL  
887 effector design and target prediction. *Nucleic Acids Res.* *40*, W117–W122.

888 Dudley, A.T., Godin, R.E., and Robertson, E.J. (1999). Interaction between FGF and BMP  
889 signaling pathways regulates development of metanephric mesenchyme. *Genes Dev.* *13*,  
890 1601–1613.

891 Farre, D., Roset, R., Huerta, M., Adsuara, J.E., Rosello, L., Alba, M.M., and Messeguer, X.  
892 (2003). Identification of patterns in biological sequences at the ALGGEN server: PROMO  
893 and MALGEN. *Nucleic Acids Res.* *31*, 3651–3653.

894 Feng, J.Q., Zhang, J., Tan, X., Lu, Y., Guo, D., and Harris, S.E. (2002). Identification of Cis-DNA  
895 Regions Controlling Bmp4 Expression during Tooth Morphogenesis in vivo. *J. Dent. Res.* *81*,  
896 6–10.

897 Ferguson, C.A., Tucker, A.S., Christensen, L., Lau, A.L., Matzuk, M.M., and Sharpe, P.T. (1998).  
898 Activin is an essential early mesenchymal signal in tooth development that is required for  
899 patterning of the murine dentition. *Genes Dev.* *12*, 2636–2649.

900 Ferguson, C.A., Tucker, A.S., Heikinheimo, K., Nomura, M., Oh, P., Li, E., and Sharpe, P.T.  
901 (2001). The role of effectors of the activin signalling pathway, activin receptors IIA and IIB,  
902 and Smad2, in patterning of tooth. *Development* *128*, 4605–4613.

903 Fisher, S., Grice, E.A., Vinton, R.M., Bessling, S.L., Urasaki, A., Kawakami, K., and McCallion,  
904 A.S. (2006). Evaluating the biological relevance of putative enhancers using Tol2  
905 transposon-mediated transgenesis in zebrafish. *Nat. Protoc.* *1*, 1297–1305.

906 Fraser, G.J., Bloomquist, R.F., and Streelman, J.T. (2013). Common developmental pathways  
907 link tooth shape to regeneration. *Dev. Biol.* *377*, 399–414.

908 Freitas, R., Zhang, G., and Cohn, M.J. (2006). Evidence that mechanisms of fin development  
909 evolved in the midline of early vertebrates. *Nature* *442*, 1033–1037.

910 Fujimori, S., Novak, H., Weissenböck, M., Jussila, M., Gonçalves, A., Zeller, R., Galloway, J.,  
911 Thesleff, I., and Hartmann, C. (2010). Wnt/ $\beta$ -catenin signaling in the dental mesenchyme  
912 regulates incisor development by regulating Bmp4. *Dev. Biol.* *348*, 97–106.

913 Gaete, M., and Tucker, A.S. (2013). Organized Emergence of Multiple-Generations of Teeth  
914 in Snakes Is Dysregulated by Activation of Wnt/Beta-Catenin Signalling. *PLoS ONE* *8*,  
915 e74484.



- 916 Genderen, C. van, Okamura, R.M., Fariñas, I., Quo, R.G., Parslow, T.G., Bruhn, L., and  
917 Grosschedl, R. (1994). Development of several organs that require inductive epithelial-  
918 mesenchymal interactions is impaired in LEF-1-deficient mice. *Genes Dev.* *8*, 2691–2703.
- 919 Gordon, K.L., and Ruvinsky, I. (2012). Tempo and Mode in Evolution of Transcriptional  
920 Regulation. *PLoS Genet* *8*, e1002432.
- 921 Gudbjartsson, D.F., Walters, G.B., Thorleifsson, G., Stefansson, H., Halldorsson, B.V.,  
922 Zusmanovich, P., Sulem, P., Thorlacius, S., Gylfason, A., Steinberg, S., et al. (2008). Many  
923 sequence variants affecting diversity of adult human height. *Nat. Genet.* *40*, 609–615.
- 924 Guenther, C., Pantalena-Filho, L., and Kingsley, D.M. (2008). Shaping Skeletal Growth by  
925 Modular Regulatory Elements in the *Bmp5* Gene. *PLoS Genet.* *4*.
- 926 Hogan, B.L. (1996). Bone morphogenetic proteins: multifunctional regulators of vertebrate  
927 development. *Genes Dev.* *10*, 1580–1594.
- 928 Houlston, R.S., Webb, E., Broderick, P., Pittman, A.M., Di Bernardo, M.C., Lubbe, S., Chandler,  
929 I., Vijayakrishnan, J., Sullivan, K., Penegar, S., et al. (2008). Meta-analysis of genome-wide  
930 association data identifies four new susceptibility loci for colorectal cancer. *Nat. Genet.* *40*,  
931 1426–1435.
- 932 Huang, S.-M.A., Mishina, Y.M., Liu, S., Cheung, A., Stegmeier, F., Michaud, G.A., Charlat, O.,  
933 Wiелlette, E., Zhang, Y., Wiessner, S., et al. (2009). Tankyrase inhibition stabilizes axin and  
934 antagonizes Wnt signalling. *Nature* *461*, 614–620.
- 935 Inman, G.J., Nicolás, F.J., Callahan, J.F., Harling, J.D., Gaster, L.M., Reith, A.D., Laping, N.J., and  
936 Hill, C.S. (2002). SB-431542 Is a Potent and Specific Inhibitor of Transforming Growth  
937 Factor- $\beta$  Superfamily Type I Activin Receptor-Like Kinase (ALK) Receptors ALK4, ALK5,  
938 and ALK7. *Mol. Pharmacol.* *62*, 65–74.
- 939 Jackman, W.R., and Stock, D.W. (2006). Transgenic analysis of *Dlx* regulation in fish tooth  
940 development reveals evolutionary retention of enhancer function despite organ loss. *Proc.*  
941 *Natl. Acad. Sci.* *103*, 19390–19395.
- 942 Jackman, W.R., Davies, S.H., Lyons, D.B., Stauder, C.K., Denton-Schneider, B.R., Jowdry, A.,  
943 Aigler, S.R., Vogel, S.A., and Stock, D.W. (2013). Manipulation of *Fgf* and *Bmp* signaling in  
944 teleost fishes suggests potential pathways for the evolutionary origin of multicuspid teeth.  
945 *Evol. Dev.* *15*, 107–118.
- 946 Jumlongras, D., Lachke, S.A., O’Connell, D.J., Aboukhalil, A., Li, X., Choe, S.E., Ho, J.W.K.,  
947 Turbe-Doan, A., Robertson, E.A., Olsen, B.R., et al. (2012). An Evolutionarily Conserved  
948 Enhancer Regulates *Bmp4* Expression in Developing Incisor and Limb Bud. *PLoS ONE* *7*,  
949 e38568.
- 950 Jung, H.-S., Francis-West, P.H., Widelitz, R.B., Jiang, T.-X., Ting-Berreth, S., Tickle, C., Wolpert,  
951 L., and Chuong, C.-M. (1998). Local Inhibitory Action of BMPs and Their Relationships with

- 952 Activators in Feather Formation: Implications for Periodic Patterning. *Dev. Biol.* 196, 11–  
953 23.
- 954 Justice, C.M., Yagnik, G., Kim, Y., Peter, I., Jabs, E.W., Erazo, M., Ye, X., Ainehsazan, E., Shi, L.,  
955 Cunningham, M.L., et al. (2012). A genome-wide association study identifies susceptibility  
956 loci for nonsyndromic sagittal craniosynostosis near BMP2 and within BBS9. *Nat. Genet.* 44,  
957 1360–1364.
- 958 Katzel, E.B., Wolenski, M., Loiselle, A.E., Basile, P., Flick, L.M., Langstein, H.N., Hilton, M.J.,  
959 Awad, H.A., Hammert, W.C., and O’Keefe, R.J. (2011). Impact of Smad3 loss of function on  
960 scarring and adhesion formation during tendon healing. *J. Orthop. Res. Off. Publ. Orthop.*  
961 *Res. Soc.* 29, 684–693.
- 962 Kavanagh, K.D., Evans, A.R., and Jernvall, J. (2007). Predicting evolutionary patterns of  
963 mammalian teeth from development. *Nature* 449, 427–432.
- 964 Kawakami, K., Takeda, H., Kawakami, N., Kobayashi, M., Matsuda, N., and Mishina, M.  
965 (2004). A Transposon-Mediated Gene Trap Approach Identifies Developmentally Regulated  
966 Genes in Zebrafish. *Dev. Cell* 7, 133–144.
- 967 Kingsley, D.M. (1994). What do BMPs do in mammals? Clues from the mouse short-ear  
968 mutation. *Trends Genet.* 10, 16–21.
- 969 Larkin, M.A., Blackshields, G., Brown, N.P., Chenna, R., McGettigan, P.A., McWilliam, H.,  
970 Valentin, F., Wallace, I.M., Wilm, A., Lopez, R., et al. (2007). Clustal W and Clustal X version  
971 2.0. *Bioinformatics* 23, 2947–2948.
- 972 Laurikkala, J., Mikkola, M., Mustonen, T., Åberg, T., Koppinen, P., Pispa, J., Nieminen, P.,  
973 Galceran, J., Grosschedl, R., and Thesleff, I. (2001). TNF Signaling via the Ligand–Receptor  
974 Pair Ectodysplasin and Edar Controls the Function of Epithelial Signaling Centers and Is  
975 Regulated by Wnt and Activin during Tooth Organogenesis. *Dev. Biol.* 229, 443–455.
- 976 Li, T.-F., Darowish, M., Zuscik, M.J., Chen, D., Schwarz, E.M., Rosier, R.N., Drissi, H., and  
977 O’Keefe, R.J. (2006). Smad3-deficient chondrocytes have enhanced BMP signaling and  
978 accelerated differentiation. *J. Bone Miner. Res. Off. J. Am. Soc. Bone Miner. Res.* 21, 4–16.
- 979 Liu, F., Chu, E.Y., Watt, B., Zhang, Y., Gallant, N.M., Andl, T., Yang, S.H., Lu, M.-M., Piccolo, S.,  
980 Schmidt-Ullrich, R., et al. (2008). Wnt/ $\beta$ -catenin signaling directs multiple stages of tooth  
981 morphogenesis. *Dev. Biol.* 313, 210–224.
- 982 Liu, W., Sun, X., Braut, A., Mishina, Y., Behringer, R.R., Mina, M., and Martin, J.F. (2005).  
983 Distinct functions for Bmp signaling in lip and palate fusion in mice. *Development* 132,  
984 1453–1461.
- 985 Lubbe, S.J., Pittman, A.M., Olver, B., Lloyd, A., Vijayakrishnan, J., Naranjo, S., Dobbins, S.,  
986 Broderick, P., Gómez-Skarmeta, J.L., and Houlston, R.S. (2012). The 14q22.2 colorectal  
987 cancer variant rs4444235 shows cis-acting regulation of BMP4. *Oncogene* 31, 3777–3784.

- 988 Marinić, M., Aktas, T., Ruf, S., and Spitz, F. (2013). An Integrated Holo-Enhancer Unit Defines  
989 Tissue and Gene Specificity of the Fgf8 Regulatory Landscape. *Dev. Cell* 24, 530–542.
- 990 Massagué, J. (2012). TGF $\beta$  signalling in context. *Nat. Rev. Mol. Cell Biol.* 13, 616–630.
- 991 Messeguer, X., Escudero, R., Farré, D., Núñez, O., Martínez, J., and Albà, M.M. (2002). PROMO:  
992 detection of known transcription regulatory elements using species-tailored searches.  
993 *Bioinformatics* 18, 333–334.
- 994 Mou, C., Jackson, B., Schneider, P., Overbeek, P.A., and Headon, D.J. (2006). Generation of the  
995 primary hair follicle pattern. *Proc. Natl. Acad. Sci.* 103, 9075–9080.
- 996 Mou, C., Pitel, F., Gourichon, D., Vignoles, F., Tzika, A., Tato, P., Yu, L., Burt, D.W., Bed’hom, B.,  
997 Tixier-Boichard, M., et al. (2011). Cryptic Patterning of Avian Skin Confers a Developmental  
998 Facility for Loss of Neck Feathering. *PLoS Biol* 9, e1001028.
- 999 Near, T.J., Eytan, R.I., Dornburg, A., Kuhn, K.L., Moore, J.A., Davis, M.P., Wainwright, P.C.,  
1000 Friedman, M., and Smith, W.L. (2012). Resolution of ray-finned fish phylogeny and timing of  
1001 diversification. *Proc. Natl. Acad. Sci.* 109, 13698–13703.
- 1002 Neubüser, A., Peters, H., Balling, R., and Martin, G.R. (1997). Antagonistic Interactions  
1003 between FGF and BMP Signaling Pathways: A Mechanism for Positioning the Sites of Tooth  
1004 Formation. *Cell* 90, 247–255.
- 1005 Newburger, D.E., and Bulyk, M.L. (2009). UniPROBE: an online database of protein binding  
1006 microarray data on protein–DNA interactions. *Nucleic Acids Res.* 37, D77–D82.
- 1007 Nie, X., Luukko, K., and Kettunen, P. (2006). BMP signalling in craniofacial development. *Int.*  
1008 *J. Dev. Biol.* 50.
- 1009 O’Connell, D.J., Ho, J.W.K., Mammoto, T., Turbe-Doan, A., O’Connell, J.T., Haseley, P.S., Koo, S.,  
1010 Kamiya, N., Ingber, D.E., Park, P.J., et al. (2012). A Wnt-bmp feedback circuit controls  
1011 intertissue signaling dynamics in tooth organogenesis. *Sci. Signal.* 5, ra4.
- 1012 Oka, S., Oka, K., Xu, X., Sasaki, T., Bringas Jr., P., and Chai, Y. (2007). Cell autonomous  
1013 requirement for TGF- $\beta$  signaling during odontoblast differentiation and dentin matrix  
1014 formation. *Mech. Dev.* 124, 409–415.
- 1015 Oshima, M., Oshima, H., and Taketo, M.M. (1996). TGF-beta receptor type II deficiency  
1016 results in defects of yolk sac hematopoiesis and vasculogenesis. *Dev. Biol.* 179, 297–302.
- 1017 Perry, M.W., Boettiger, A.N., Bothma, J.P., and Levine, M. (2010). Shadow enhancers foster  
1018 robustness of *Drosophila* gastrulation. *Curr. Biol. CB* 20, 1562–1567.
- 1019 Pregizer, S., and Mortlock, D.P. (2009). Control of BMP gene expression by long-range  
1020 regulatory elements. *Cytokine Growth Factor Rev.* 20, 509–515.

- 1021 Ross, M.T., LaBrie, S., McPherson, J., and Stanton, V.P. (1999). Screening large-insert  
1022 libraries by hybridization. In *Current Protocols in Human Genetics*, N.C. Dracopoli, J.L.  
1023 Haines, and B. Korf, eds. (New York: John Wiley and Sons), pp. 5.6.1–5.6.52.
- 1024 Sanford, L.P., Ormsby, I., Groot, A.C.G., Sariola, H., Friedman, R., Boivin, G.P., Cardell, E.L., and  
1025 Doetschman, T. (1997). TGFbeta2 knockout mice have multiple developmental defects that  
1026 are non-overlapping with other TGFbeta knockout phenotypes. *Development* 124, 2659–  
1027 2670.
- 1028 Scheer, N., and Campos-Ortega, J.A. (1999). Use of the Gal4-UAS technique for targeted gene  
1029 expression in the zebrafish. *Mech. Dev.* 80, 153–158.
- 1030 Shi, M., Murray, J.C., Marazita, M.L., Munger, R.G., Ruczinski, I., Hetmanski, J.B., Wu, T.,  
1031 Murray, T., Redett, R.J., Wilcox, A.J., et al. (2012). Genome wide study of maternal and  
1032 parent-of-origin effects on the etiology of orofacial clefts. *Am. J. Med. Genet. A.* 158A, 784–  
1033 794.
- 1034 Shimizu, N., Kawakami, K., and Ishitani, T. (2012). Visualization and exploration of Tcf/Lef  
1035 function using a highly responsive Wnt/ $\beta$ -catenin signaling-reporter transgenic zebrafish.  
1036 *Dev. Biol.* 370, 71–85.
- 1037 Solloway, M.J., Dudley, A.T., Bikoff, E.K., Lyons, K.M., Hogan, B.L., and Robertson, E.J. (1998).  
1038 Mice lacking Bmp6 function. *Dev. Genet.* 22, 321–339.
- 1039 Stern, D.L. (2000). Perspective: Evolutionary Developmental Biology and the Problem of  
1040 Variation. *Evolution* 54, 1079–1091.
- 1041 Sun, Z., Jin, P., Tian, T., Gu, Y., Chen, Y.-G., and Meng, A. (2006). Activation and roles of  
1042 ALK4/ALK7-mediated maternal TGF $\beta$  signals in zebrafish embryo. *Biochem. Biophys. Res.*  
1043 *Commun.* 345, 694–703.
- 1044 Suster, M.L., Abe, G., Schouw, A., and Kawakami, K. (2011). Transposon-mediated BAC  
1045 transgenesis in zebrafish. *Nat. Protoc.* 6, 1998–2021.
- 1046 Swarup, H. (1958). Stages in the Development of the Stickleback *Gasterosteus aculeatus*  
1047 (L.). *J. Embryol. Exp. Morphol.* 6, 373–383.
- 1048 Urasaki, A., Morvan, G., and Kawakami, K. (2006). Functional Dissection of the Tol2  
1049 Transposable Element Identified the Minimal cis-Sequence and a Highly Repetitive  
1050 Sequence in the Subterminal Region Essential for Transposition. *Genetics* 174, 639–649.
- 1051 Vainio, S., Karavanova, I., Jowett, A., and Thesleff, I. (1993). Identification of BMP-4 as a  
1052 signal mediating secondary induction between epithelial and mesenchymal tissues during  
1053 early tooth development. *Cell* 75, 45–58.
- 1054 Villefranc, J.A., Amigo, J., and Lawson, N.D. (2007). Gateway compatible vectors for analysis  
1055 of gene function in the zebrafish. *Dev. Dyn.* 236, 3077–3087.

- 1056 Wang, Y., Cox, M.K., Coricor, G., MacDougall, M., and Serra, R. (2013). Inactivation of *Tgfbr2*  
1057 in Osterix-Cre expressing dental mesenchyme disrupts molar root formation. *Dev. Biol.* *382*,  
1058 27–37.
- 1059 Westerfield, M. (2007). *The Zebrafish Book: A guide for the Laboratory Use of Zebrafish*  
1060 (*Danio rerio*), 5th Edition (Eugene, OR: University of Oregon Press).
- 1061 Wu, P., Wu, X., Jiang, T.-X., Elsey, R.M., Temple, B.L., Divers, S.J., Glenn, T.C., Yuan, K., Chen,  
1062 M.-H., Widelitz, R.B., et al. (2013). Specialized stem cell niche enables repetitive renewal of  
1063 alligator teeth. *Proc. Natl. Acad. Sci. U. S. A.* *110*, E2009–E2018.
- 1064 Zhao, H., Oka, K., Bringas, P., Kaartinen, V., and Chai, Y. (2008). TGF- $\beta$  type I receptor *Alk5*  
1065 regulates tooth initiation and mandible patterning in a type II receptor-independent  
1066 manner. *Dev. Biol.* *320*, 19–29.
- 1067 Zhao, X., Zhang, Z., Song, Y., Zhang, X., Zhang, Y., Hu, Y., Fromm, S.H., and Chen, Y. (2000).  
1068 Transgenically ectopic expression of *Bmp4* to the *Msx1* mutant dental mesenchyme  
1069 restores downstream gene expression but represses *Shh* and *Bmp2* in the enamel knot of  
1070 wild type tooth germ. *Mech. Dev.* *99*, 29–38.
- 1071

Figure 1

Chr. 21 (bp):

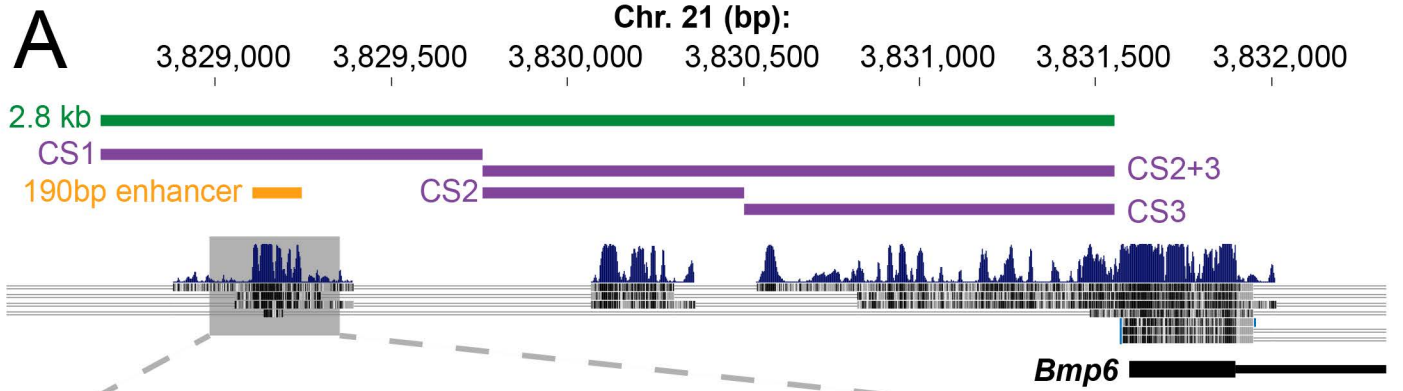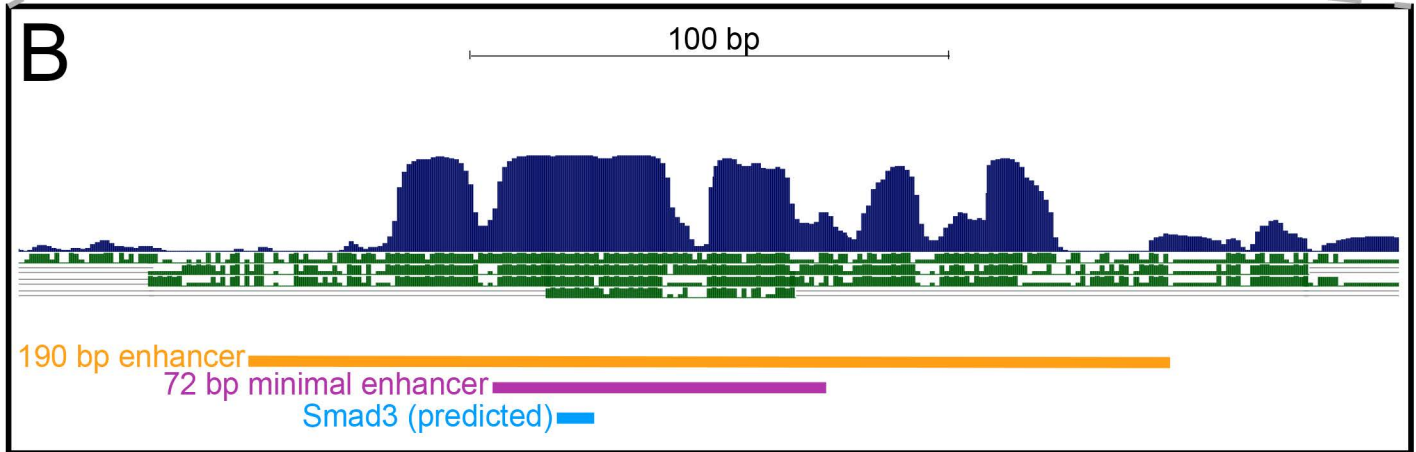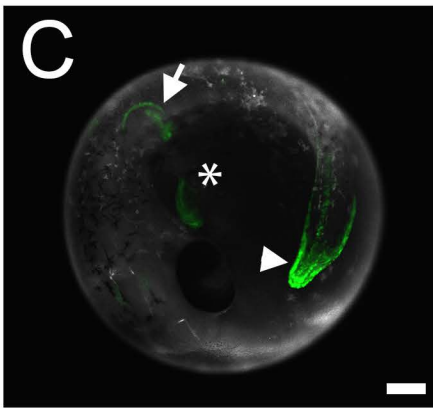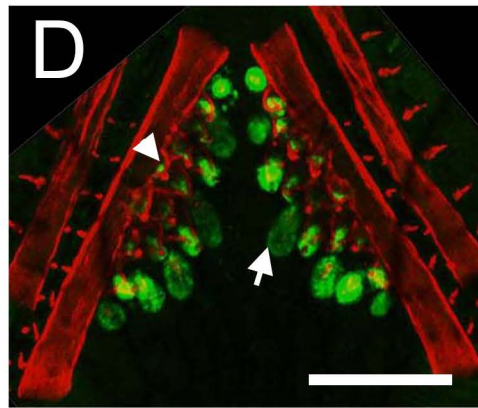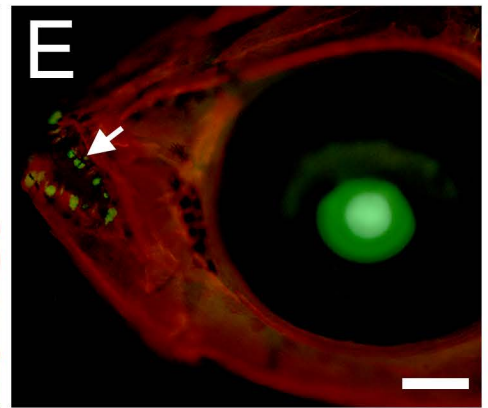

Figure 2

A

|              |     |                                                               |                          |
|--------------|-----|---------------------------------------------------------------|--------------------------|
| Stickleback  | 1   | GCGCTCGCTTGAAAAGAGAGCGATTCAAGCAGACAAAGACCTCATTAGGTCTAGGAGGTG  |                          |
| Atlantic cod | 1   | -----TGTGTGGGAGACAGAGAAAAGACCTCATTAGGTCTAGGAGGTG              |                          |
| Medaka       | 1   | TGGAGGAGGTGCGTGGGGGTTAACTCAGACAGACAAAACCTCATTAGTCTAGGAGGTG    |                          |
| Zebrafish    | 1   | CTGAAGTTCGTGCTTTGATCAAGGGA-ATGGTCATTTTCTATATGTGTTTTTAAAGTGA   | →                        |
|              |     | <b>Smad 3 site</b>                                            |                          |
| Stickleback  | 61  | TCC--TGTCTAGACAGTGTGATGACAGGACACAGAACTCTGTTTAAATGTTTCTCCT--   |                          |
| Atlantic cod | 43  | TCC--TGTCTAGACGGCCTGATGACAGGACACAGAGCTTCTGTTTAAATGTCCTCCCC--  |                          |
| Medaka       | 61  | TCC--CGTCTAGACAGCCTGATGACAGGACACAGAGCTTCTGTTTCAATGTTTCTCCT--  |                          |
| Zebrafish    | 60  | ACCATTGTCTAGACAGTATGATGACAGGAGGGTTAG--TCTGTTAACTGACCCCTCACAG  |                          |
|              |     | ←                                                             |                          |
| Stickleback  | 117 | --CCTCCCTCTACTT-CCAATTCACCCGCCGAACACACACATCACCTGCTCTGCCTCCAG  |                          |
| Atlantic cod | 99  | --CCTCCCTGGGTCC-CTCCCTCCTCCACCTAGTACACAC-----                 |                          |
| Medaka       | 117 | --TTAGCTTCAGTTCAACAACACACACAGATAG-ACACATTTACCTGCACCTGCCTAAGG  |                          |
| Zebrafish    | 118 | AATCACGCACAGGTCGTTTAT-CACACTTCTGGCAGCCGATTAGCAACTGACCCCTTGAAG |                          |
|              |     |                                                               |                          |
| Stickleback  | 174 | GGATG-TGCCCAAACACA                                            | ↔ 72 bp minimal enhancer |
| Atlantic cod |     | -----                                                         |                          |
| Medaka       | 174 | GTTGA-TGAATGAATGCA                                            |                          |
| Zebrafish    | 177 | AATGGATGAGTTTAAACA                                            |                          |

stickleback in zebrafish

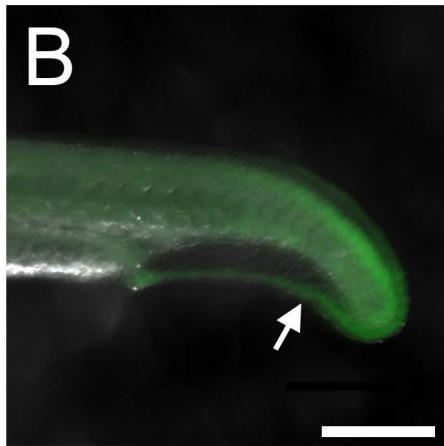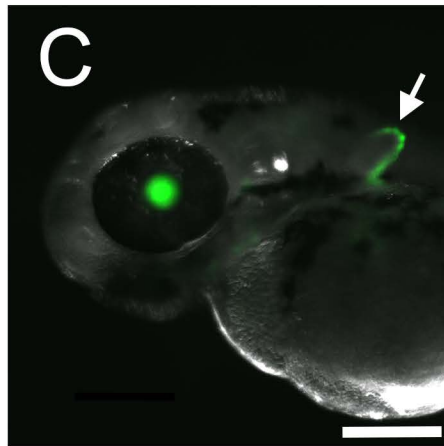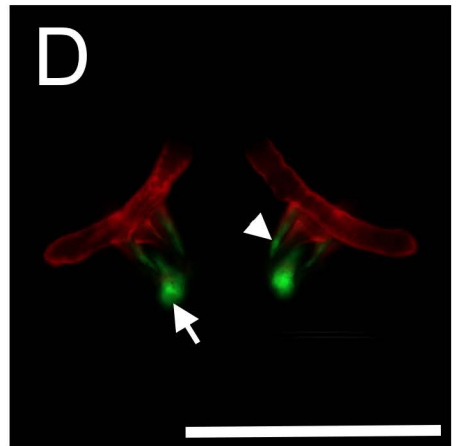

zebrafish in zebrafish

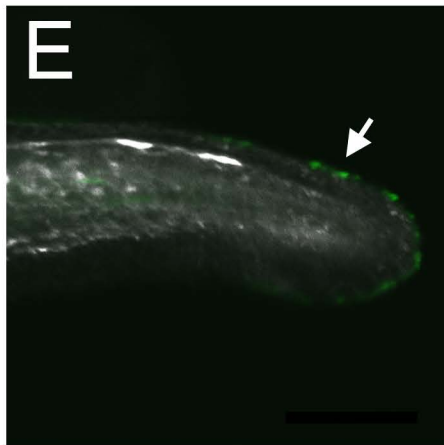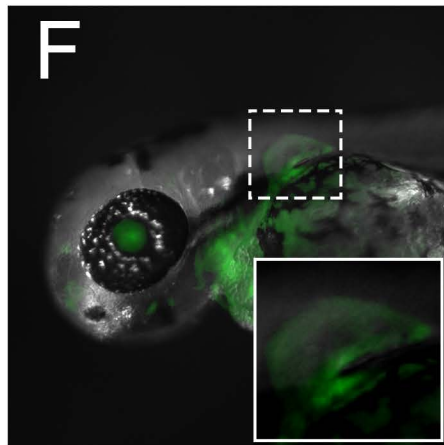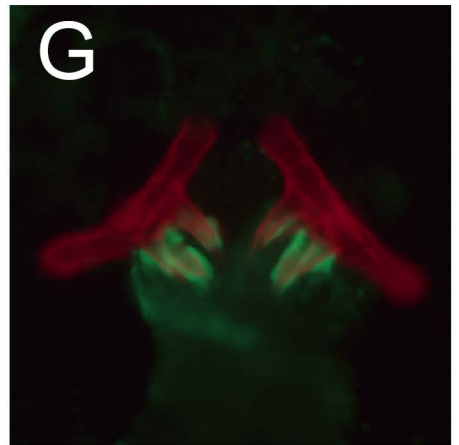

zebrafish in stickleback

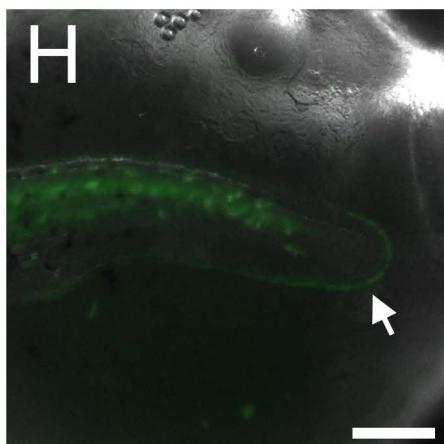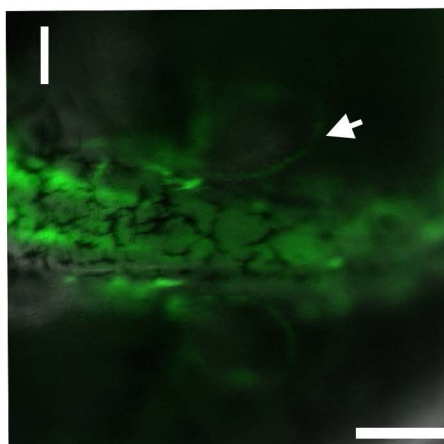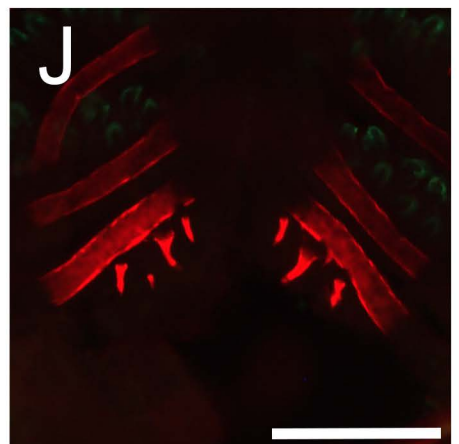

Figure 3

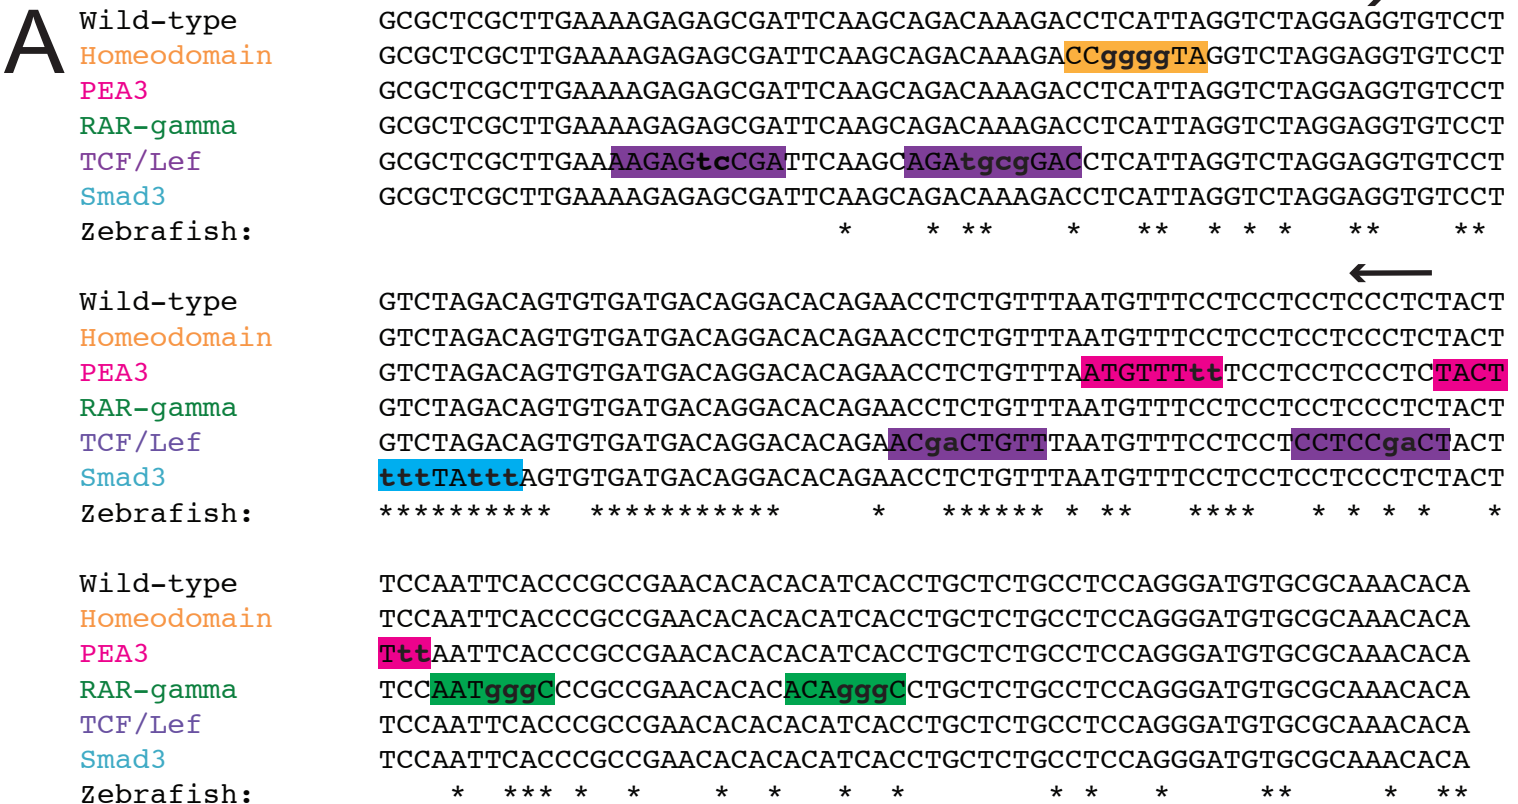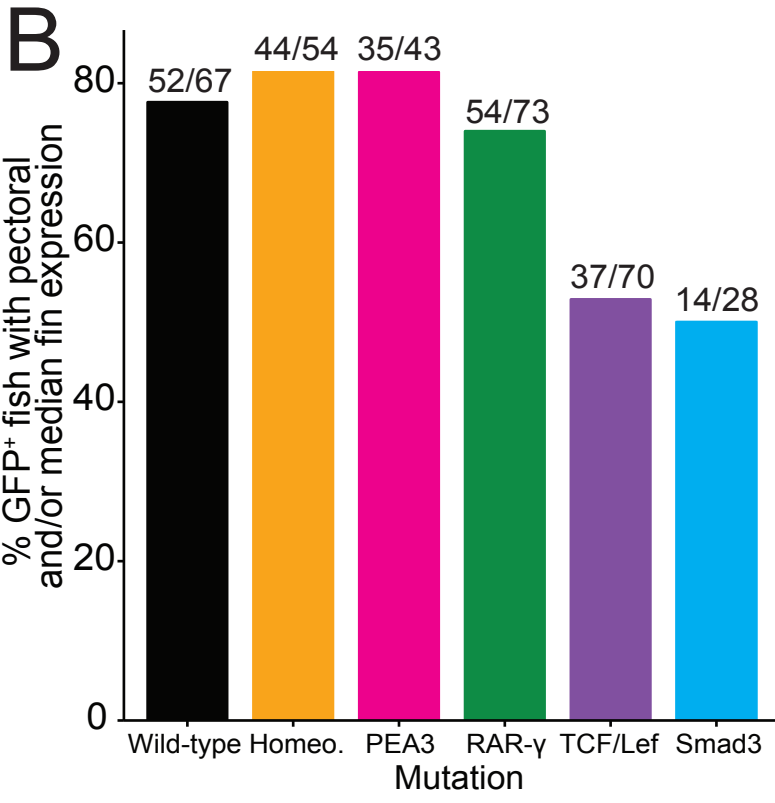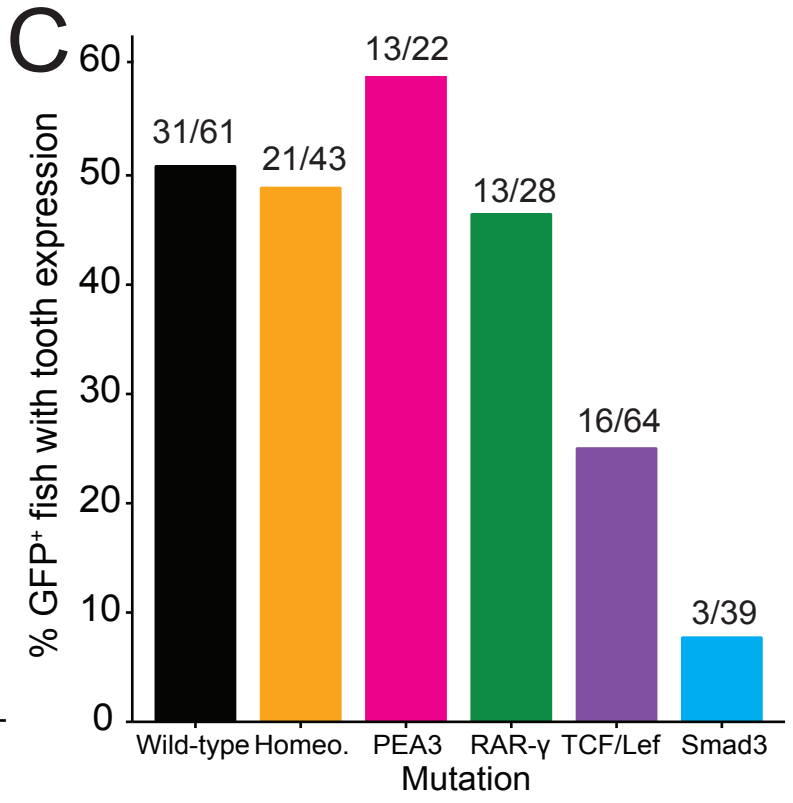



Figure 4

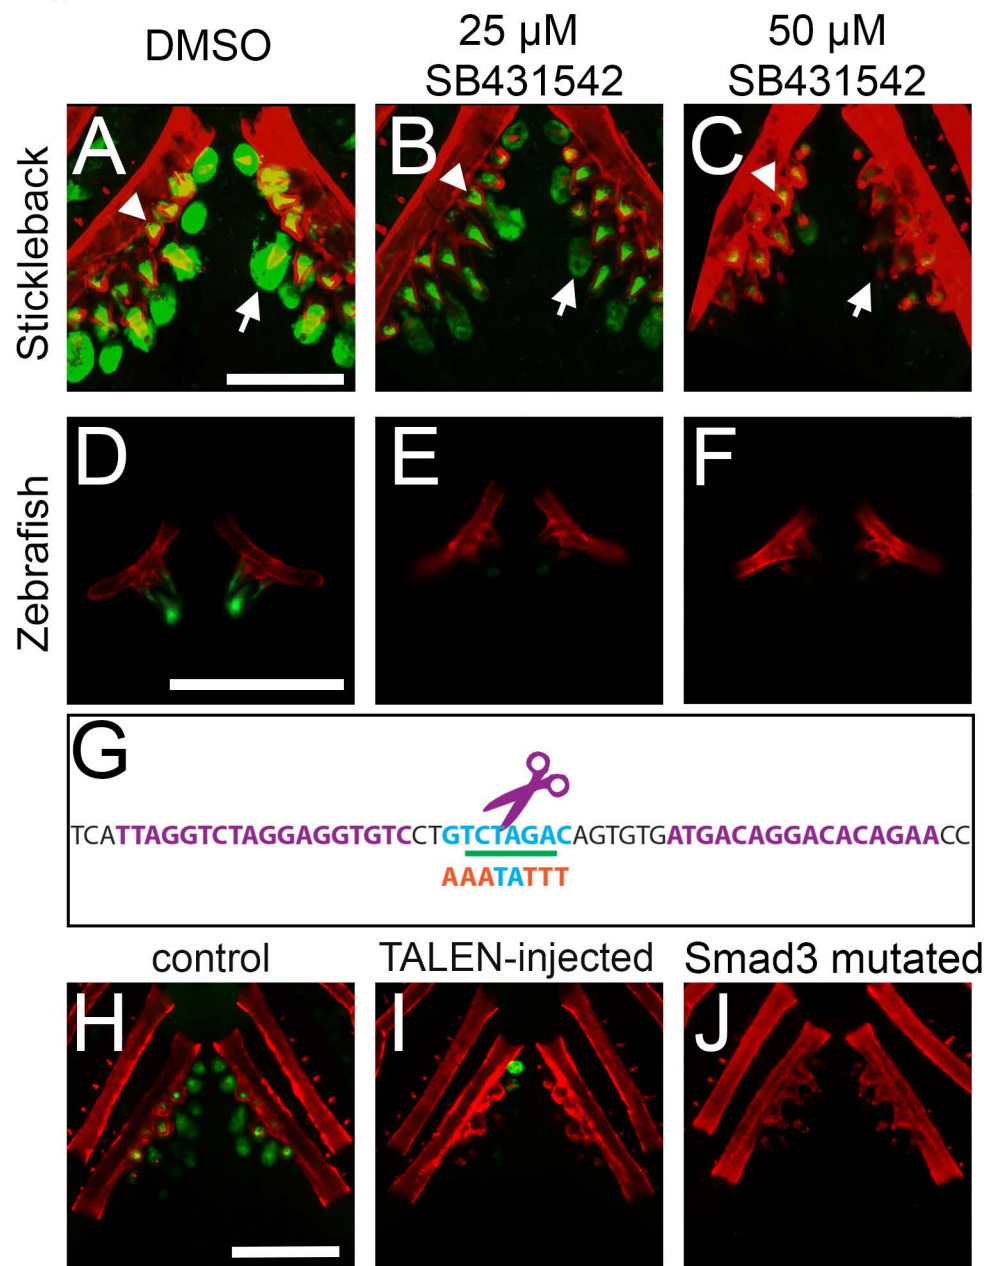

Figure 5

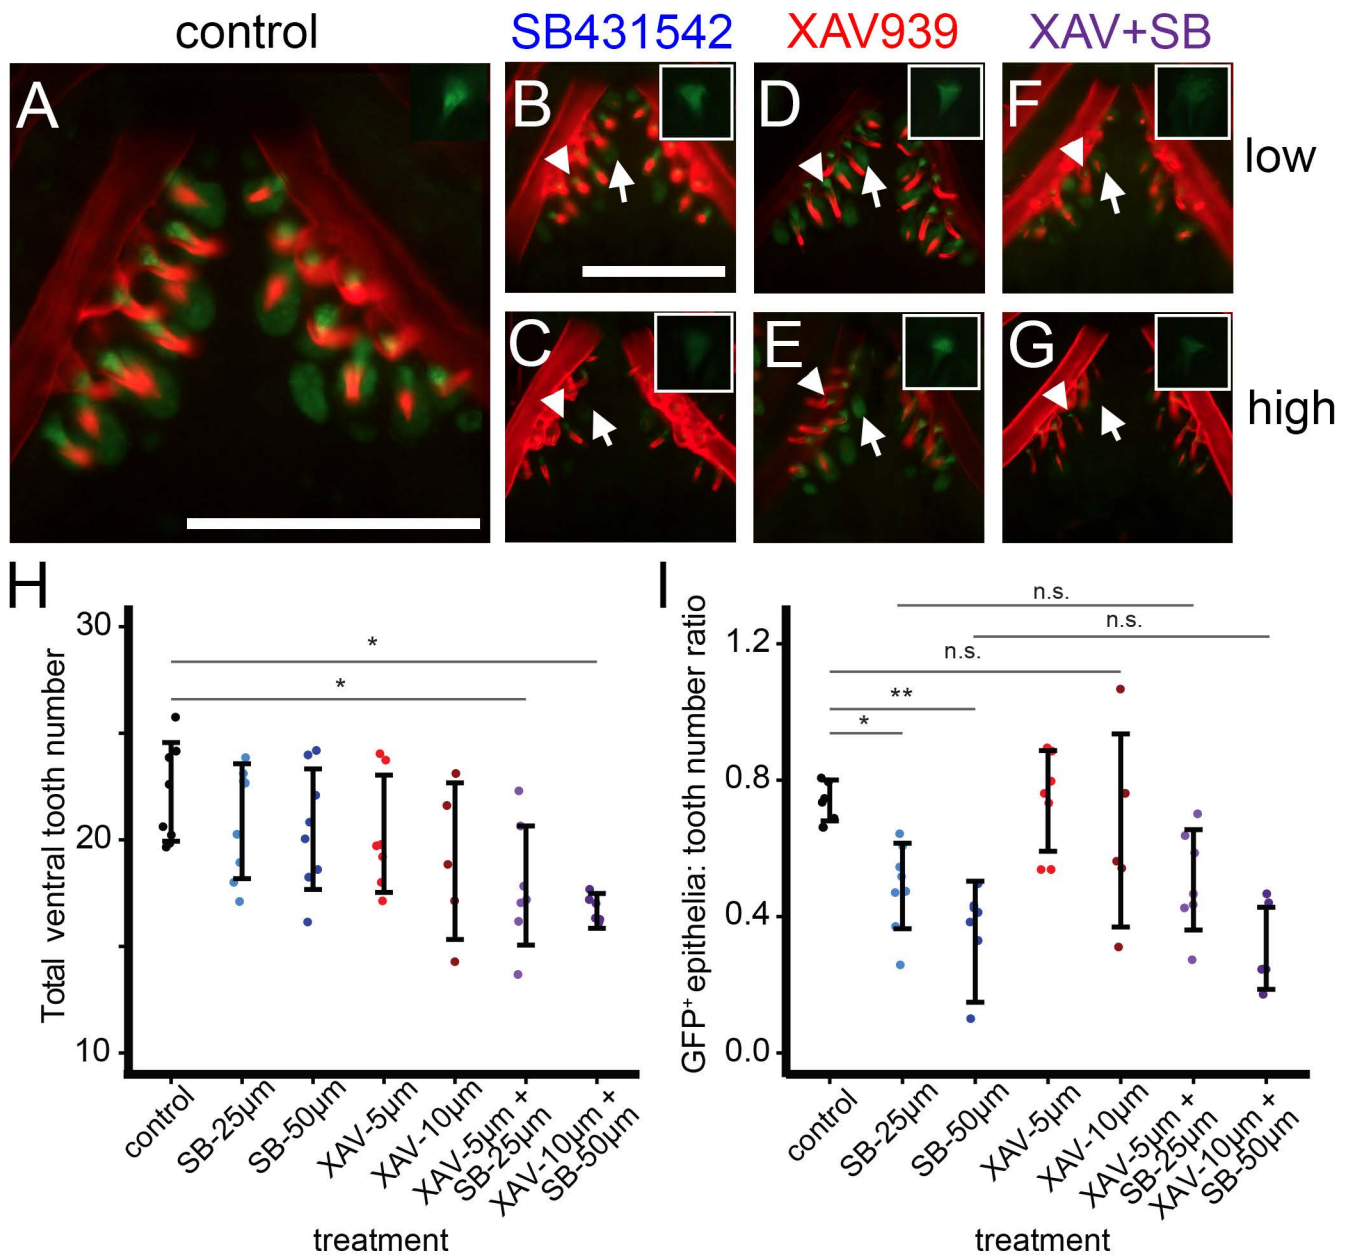

Figure 6

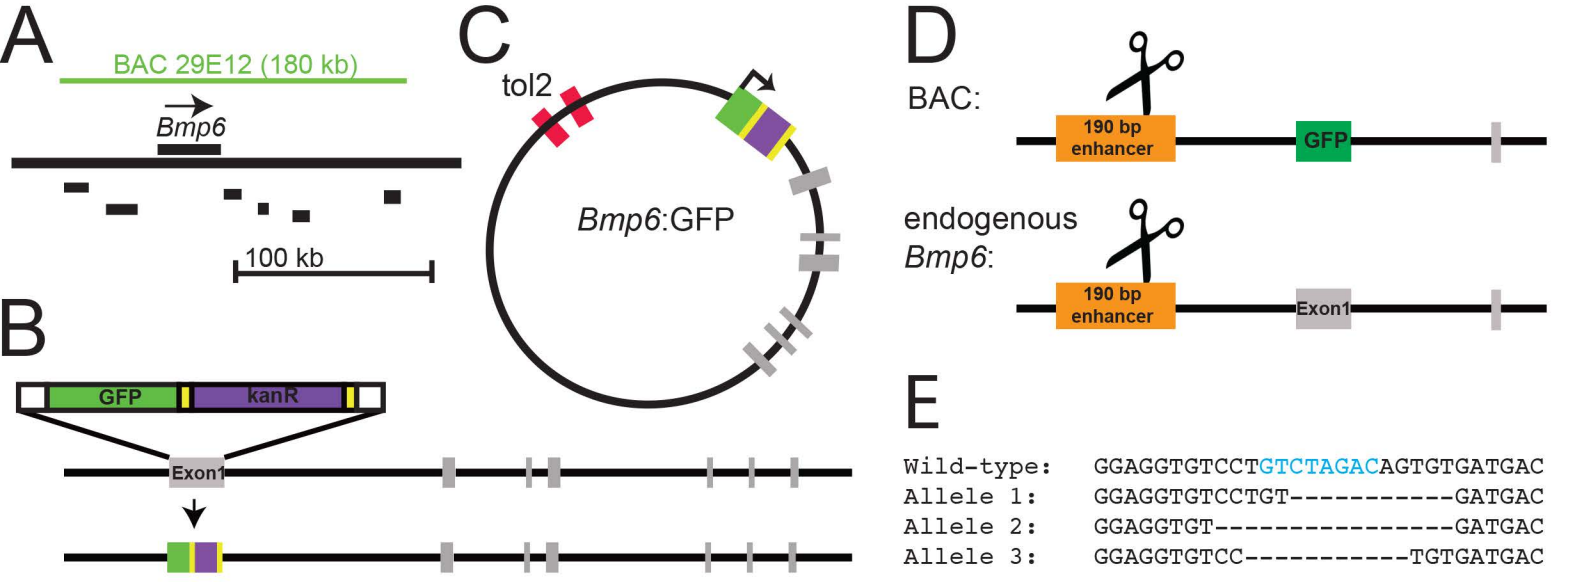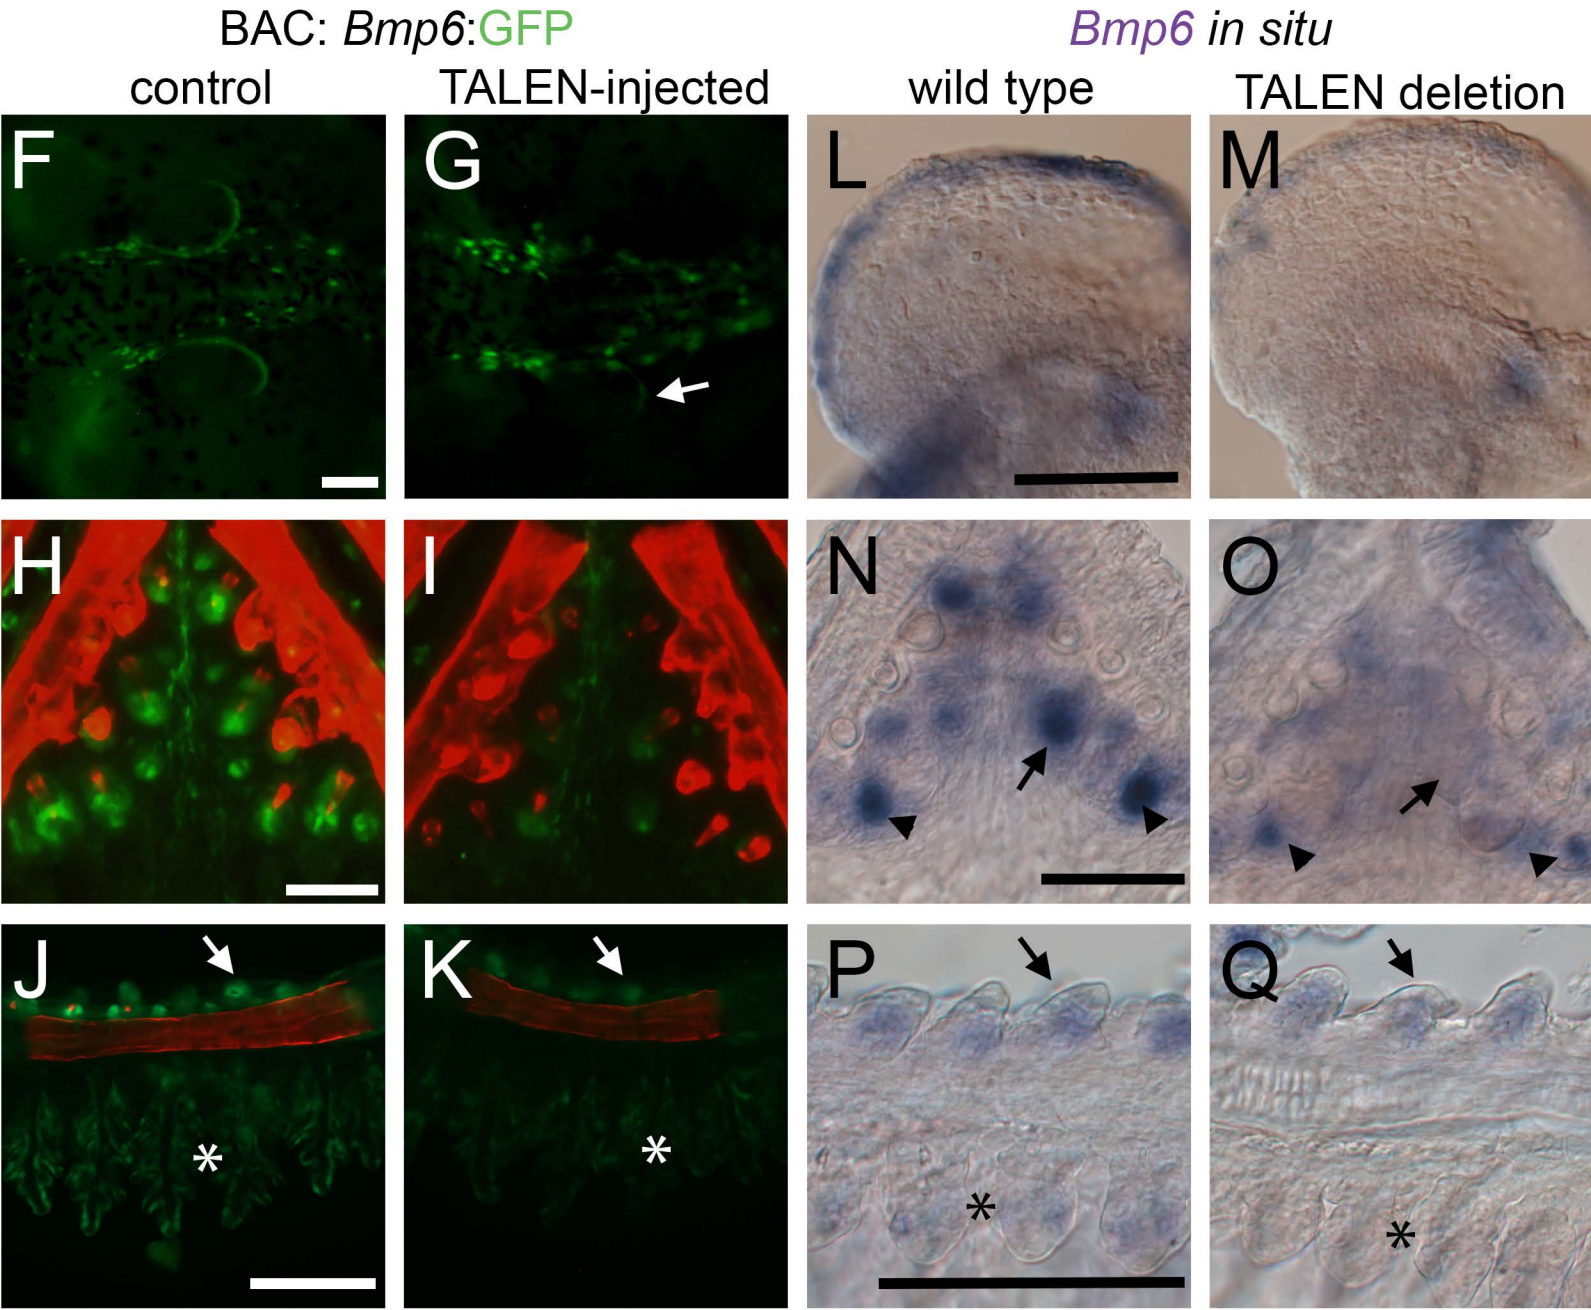

Figure 7

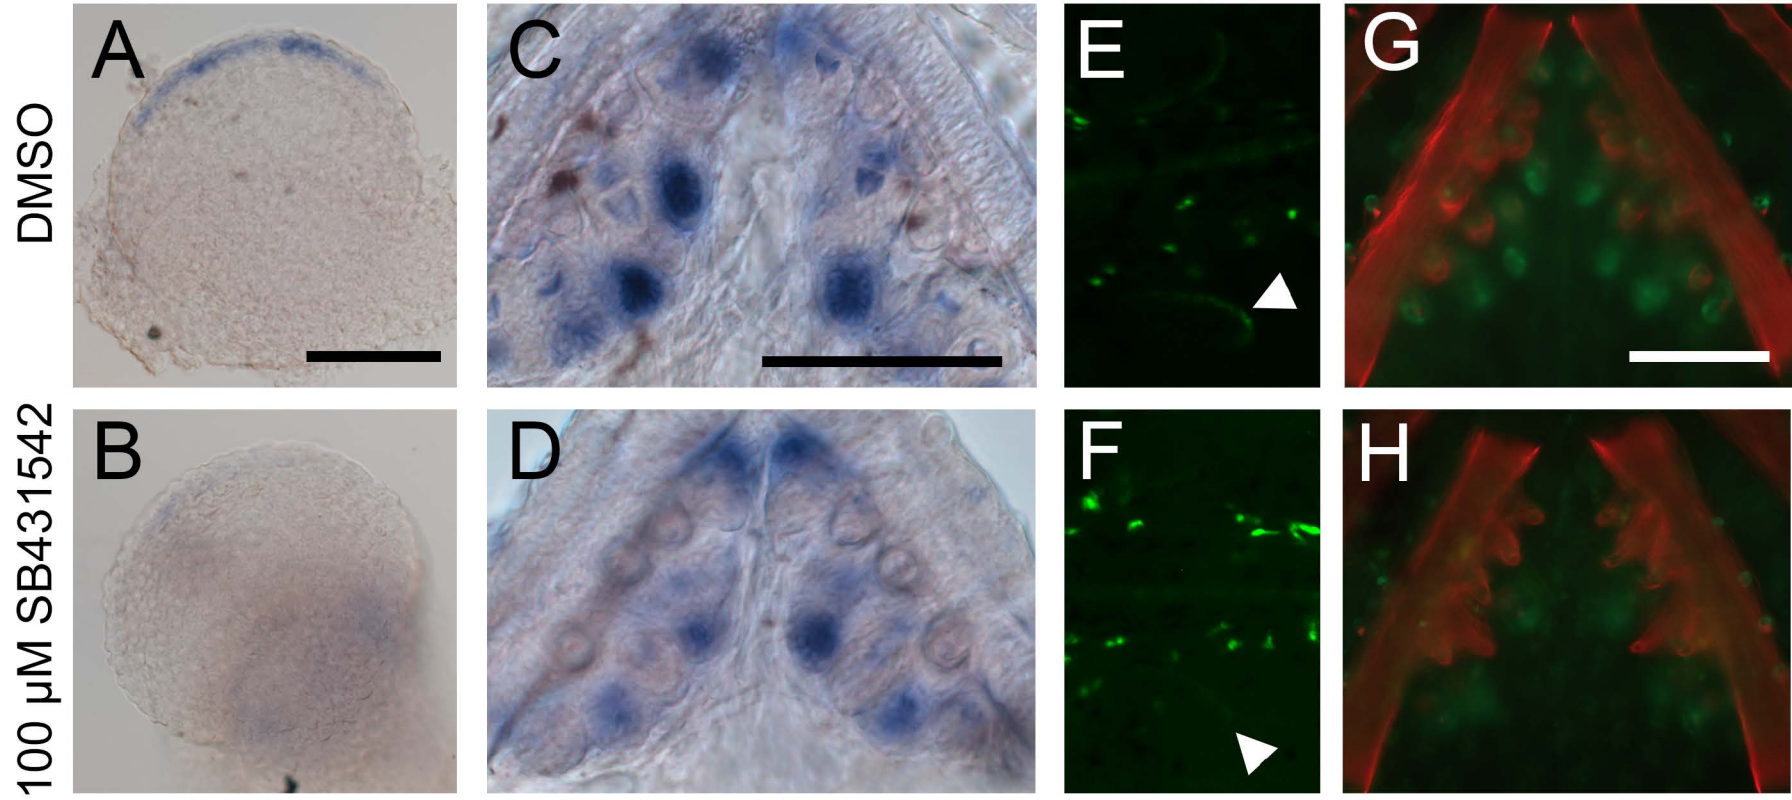

Figure S1

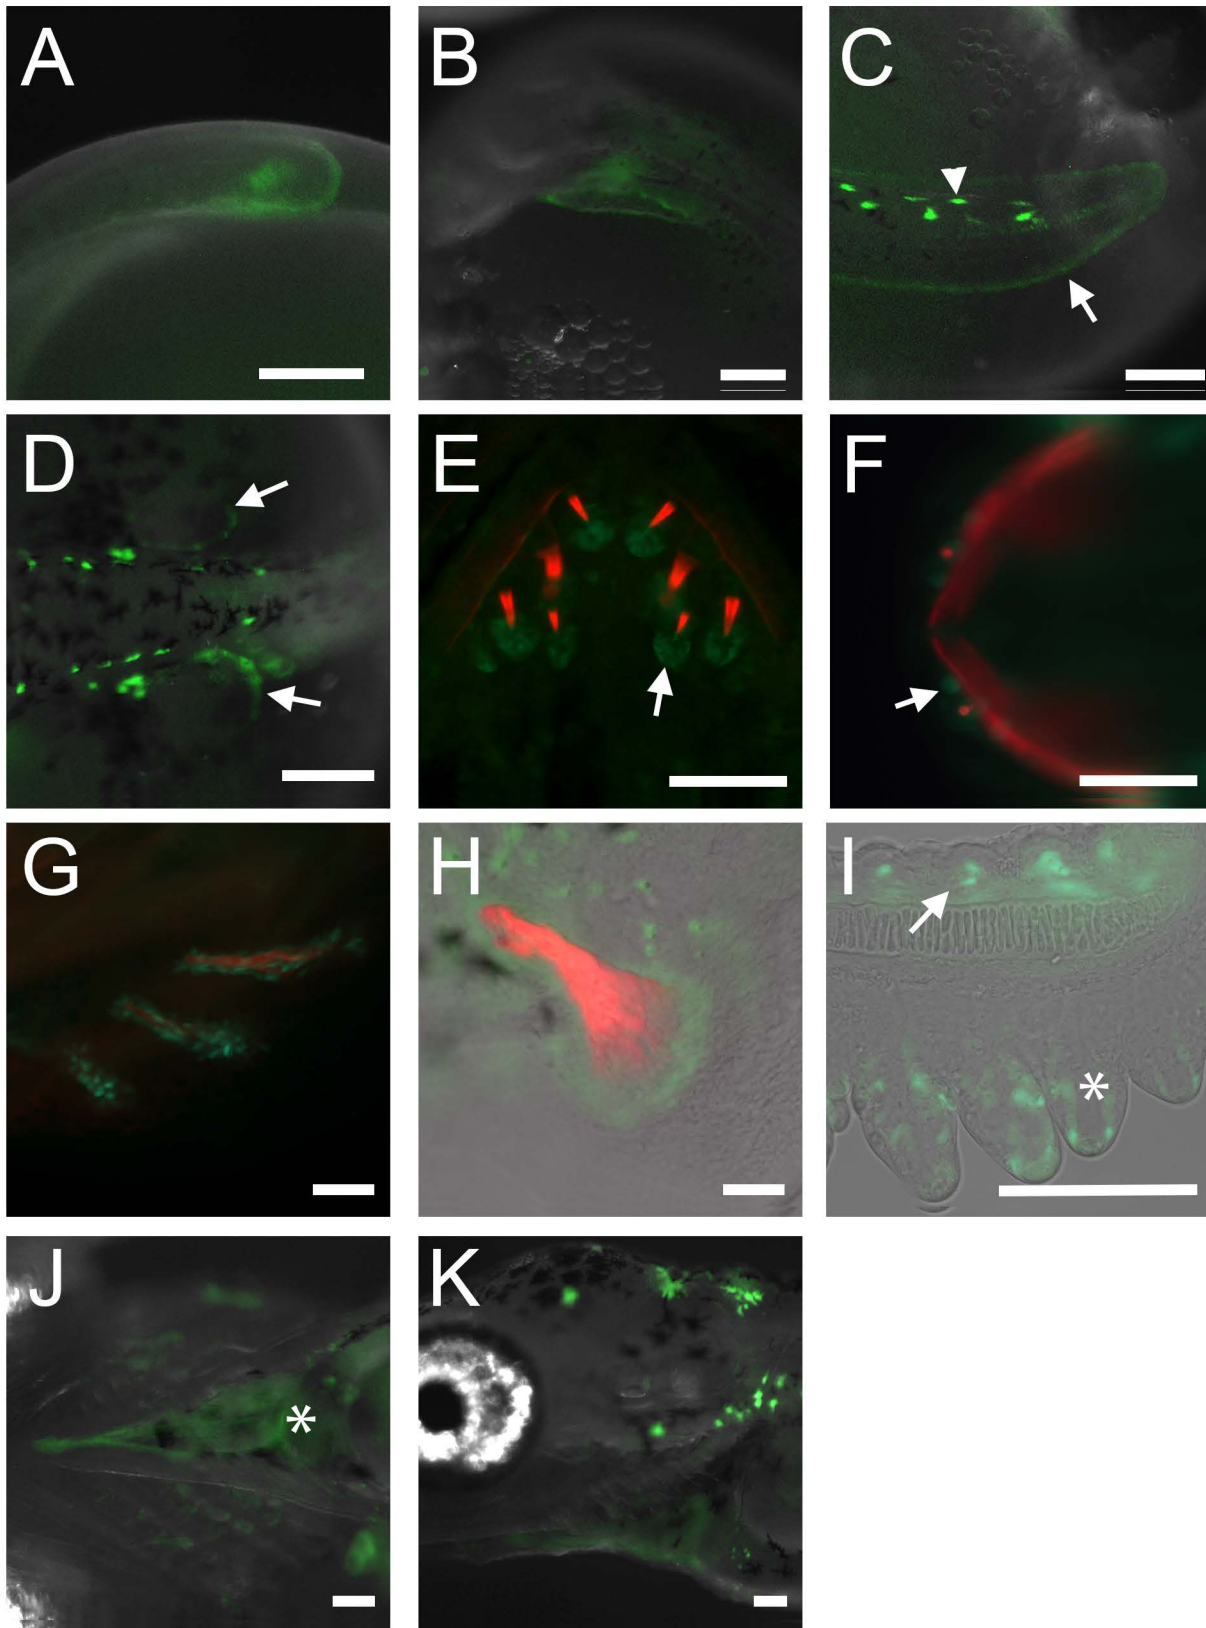

Figure S2

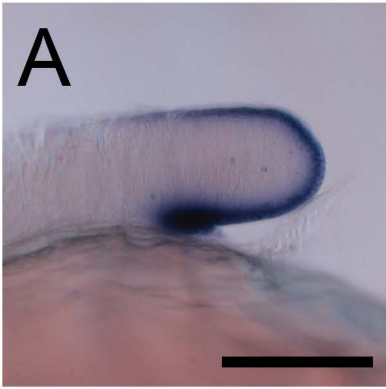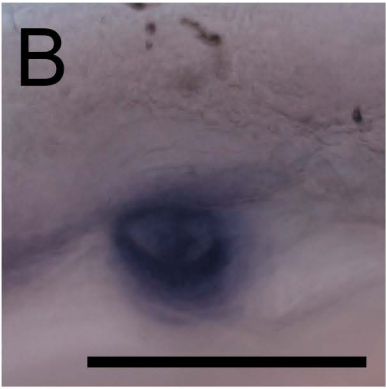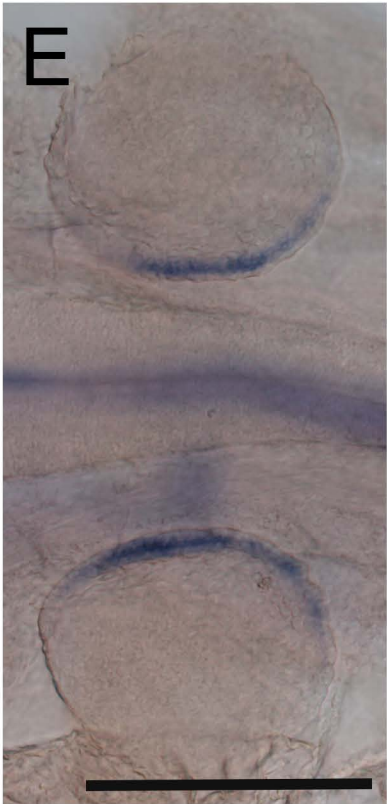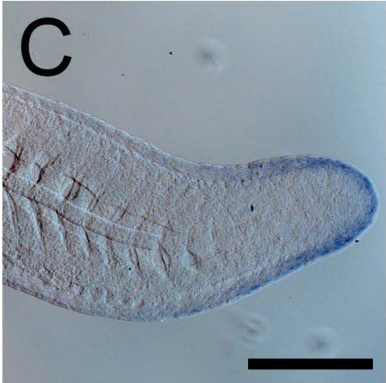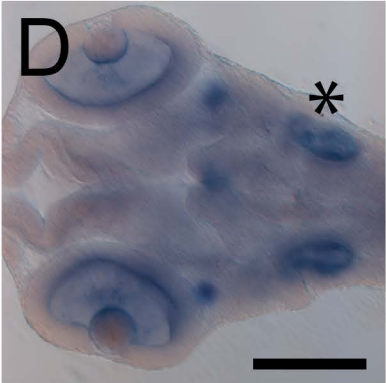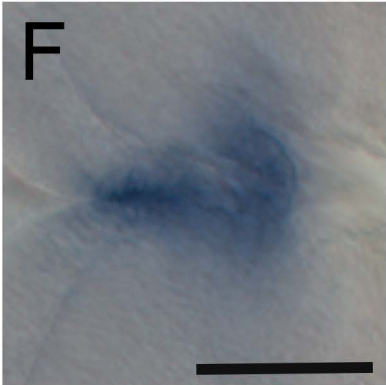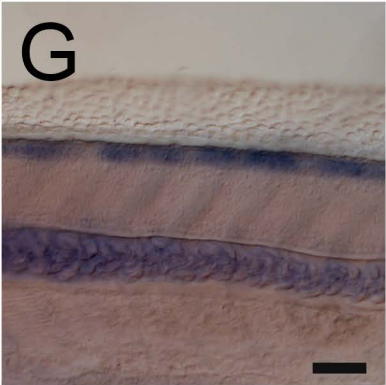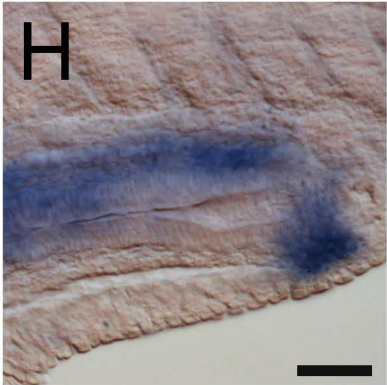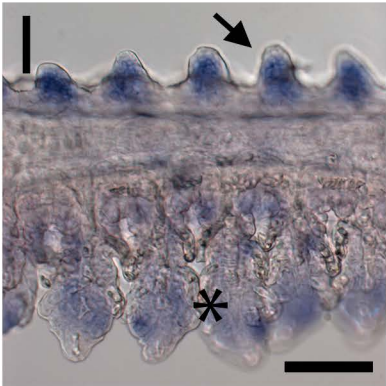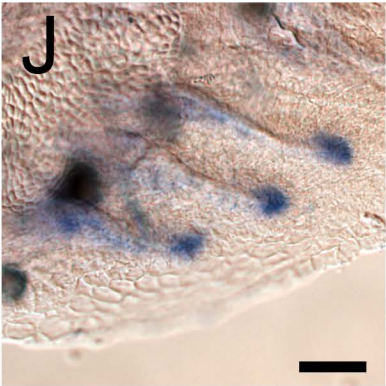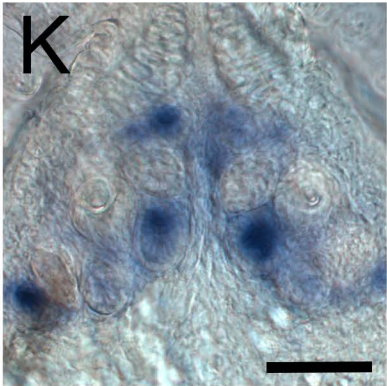

Figure S3

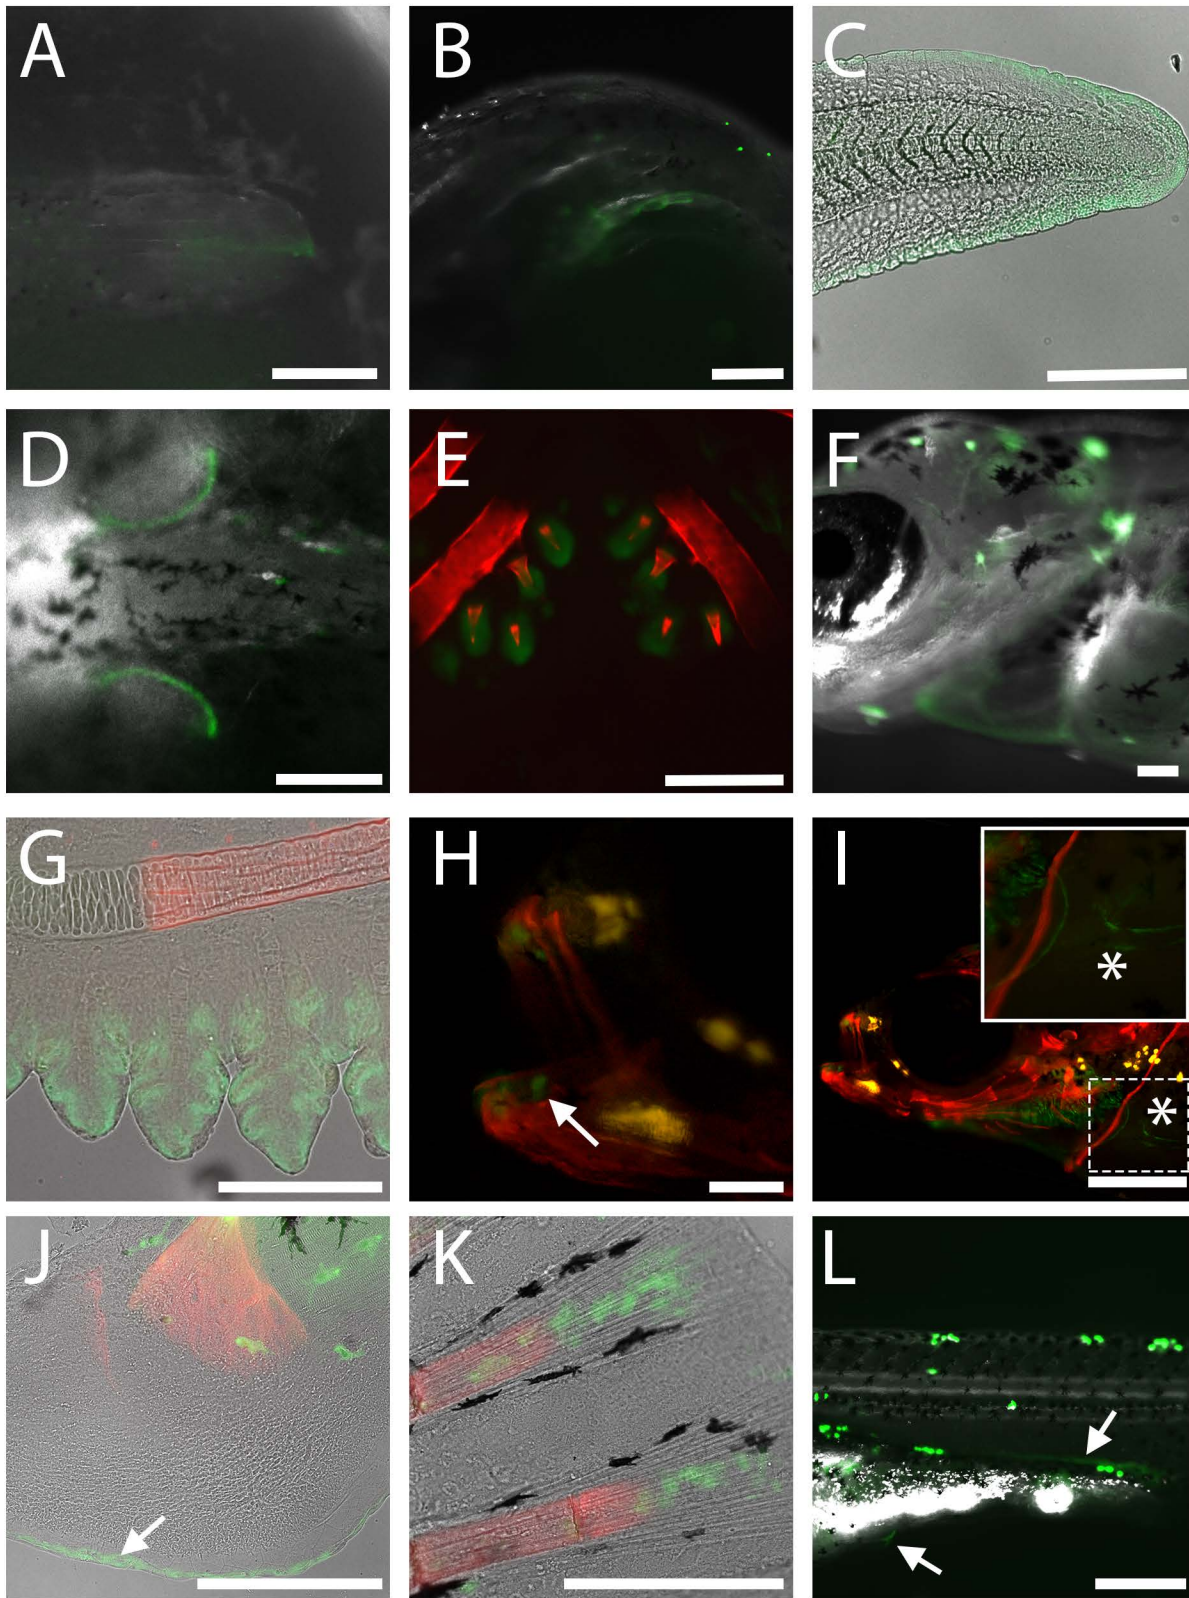

Figure S4

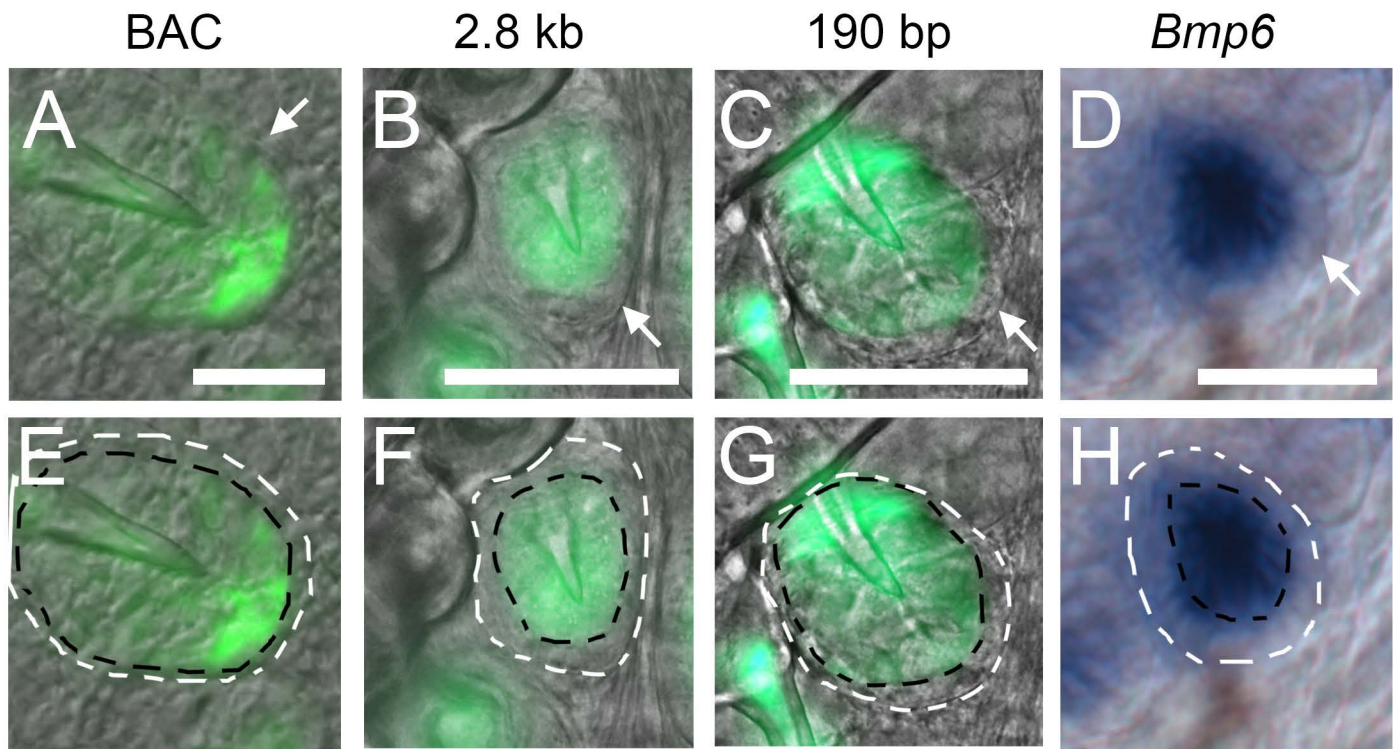



Figure S5

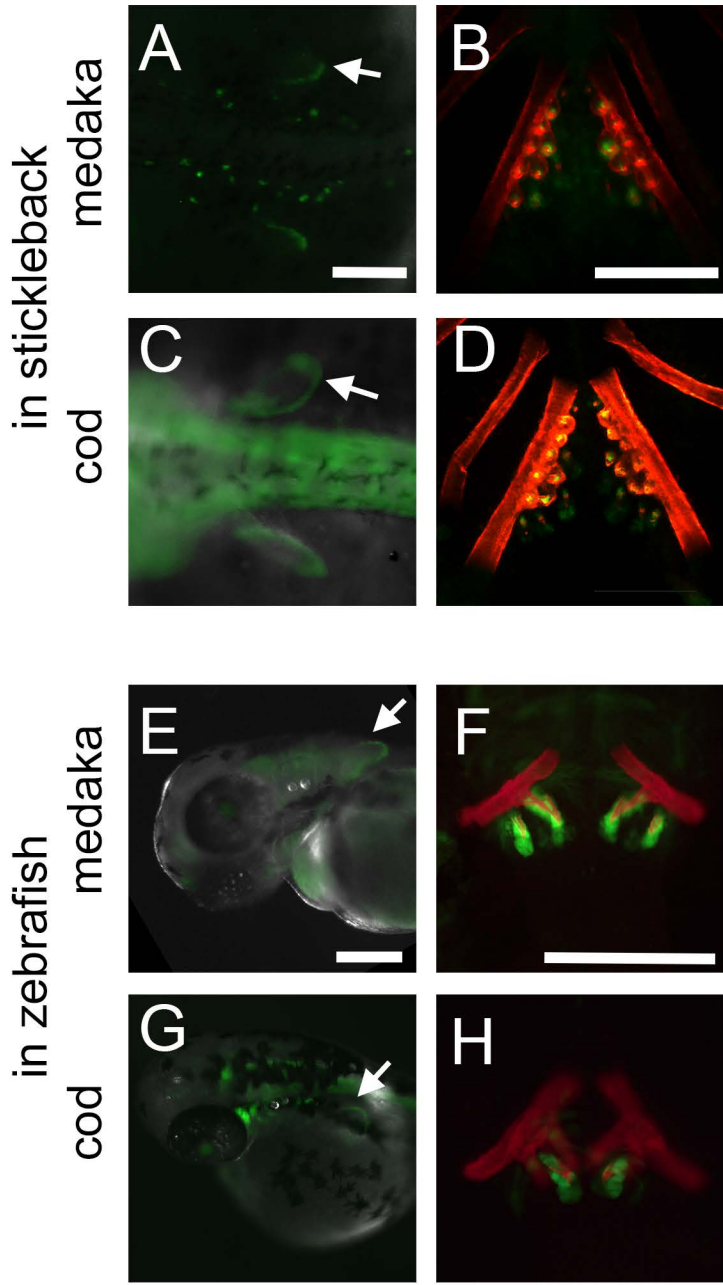

Figure S6

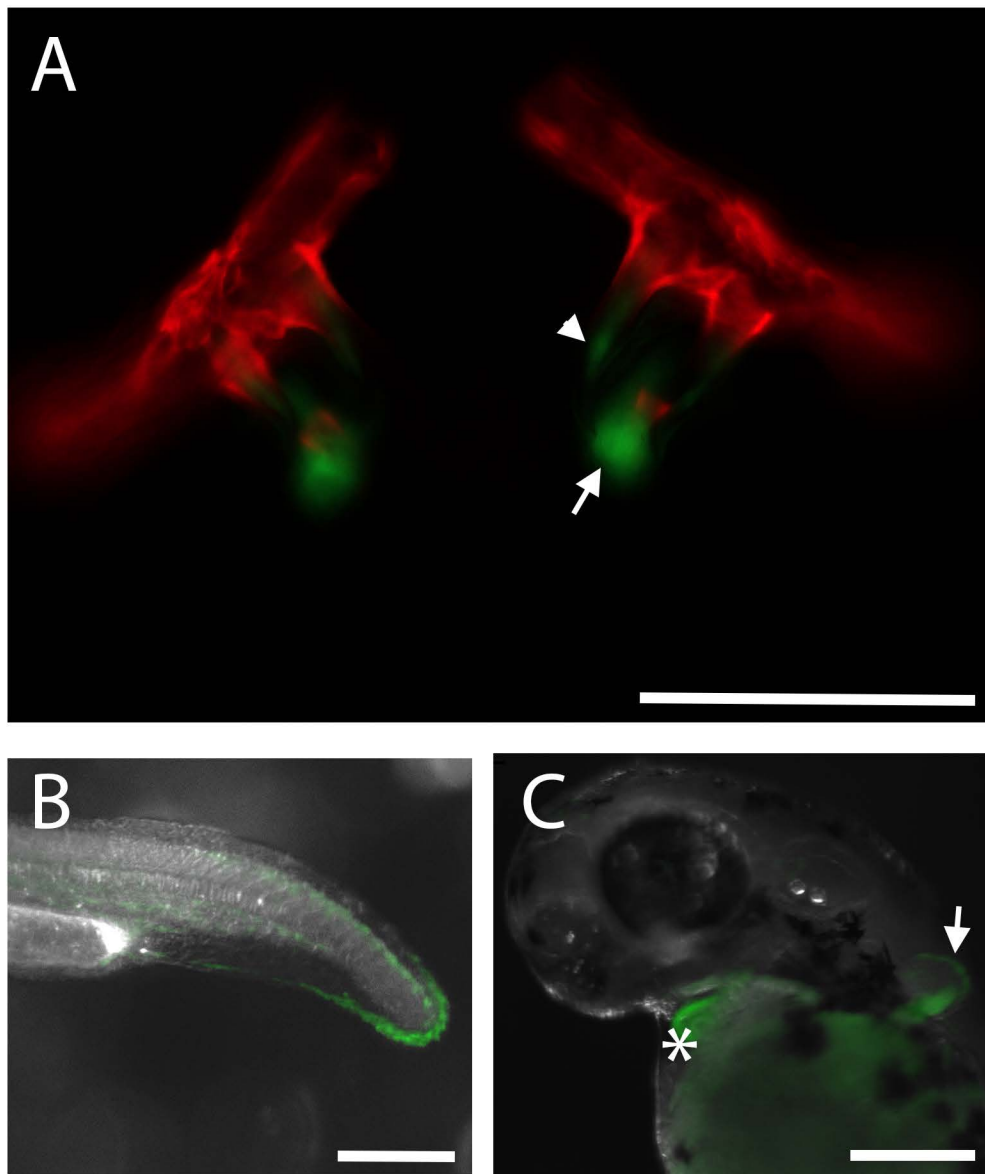

Figure S7

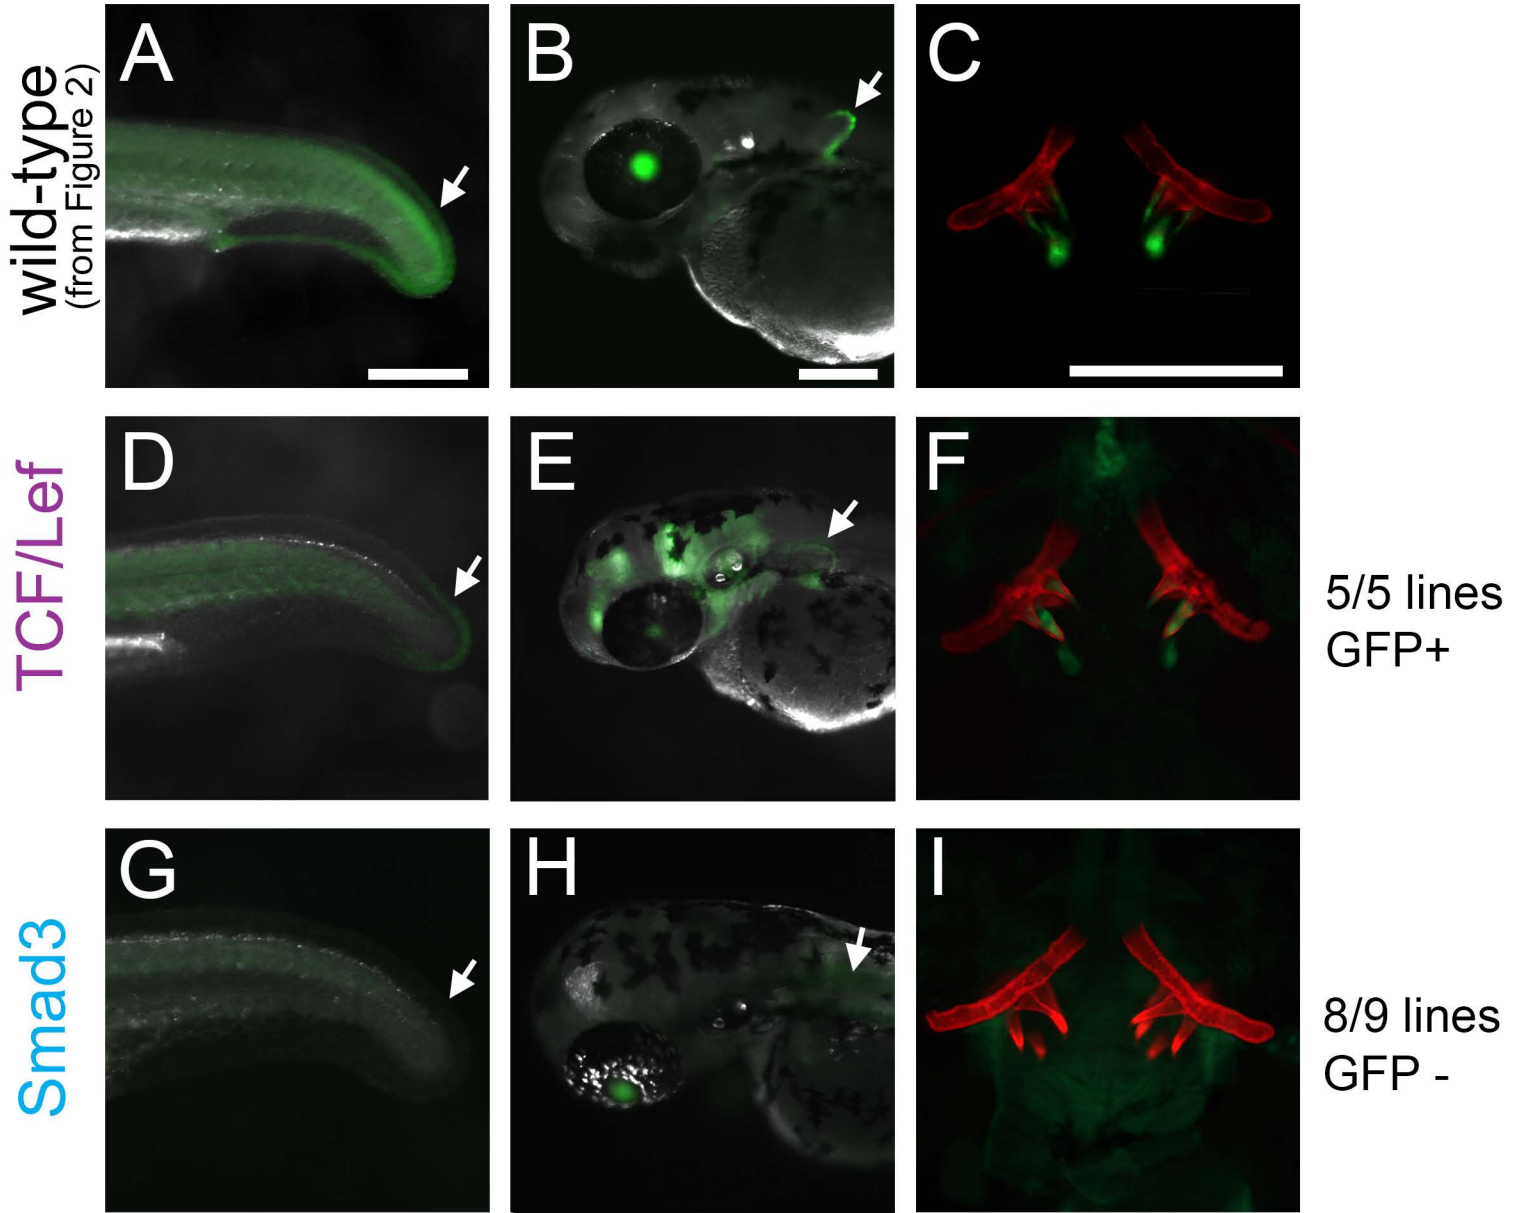

Figure S8

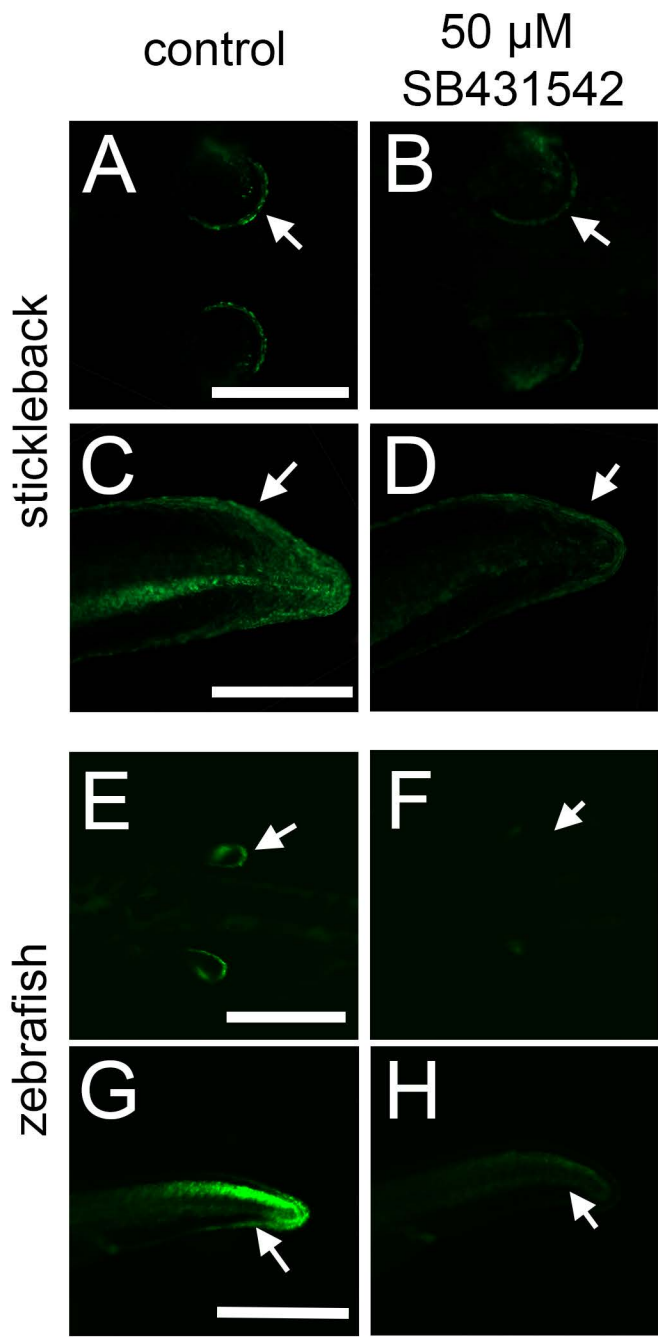

**Table S1. Primers used to clone reporter constructs, perform site directed mutagenesis, and recombiner BACs.**

**Enhancer constructs**

| <b>Primer Name</b> | <b>Sequence</b>                                                 | <b>Purpose</b>            |
|--------------------|-----------------------------------------------------------------|---------------------------|
| Gac_3kb_for        | GCCGATCGATATAGGAAGGCTGGACAACGA                                  | stickleback 3kb forward   |
| Gac_3kb_rev        | GCCGATCGATAGAACACAGCGGGGAAACACC                                 | stickleback 3kb reverse   |
| Gac_CS1_rev        | GCCGATCGATAGTATGGTGCCTGTGTGCAT                                  | stickleback CS1 reverse   |
| Gac_CS2_for        | GCCGATCGATATGCACACACGCACCATACT                                  | stickleback CS2 forward   |
| Gac_CS2_rev        | GCCGATCGATGAAACAGCAAGCAATGACGA                                  | stickleback CS2 reverse   |
| Gac_CS3_for        | GCCGATCGATTCTGTCATTGCTTGCTGTTTC                                 | stickleback CS3 forward   |
| Gac_190_for        | GCCGGCTAGCGCGCTCGCTTGAAAAGAGAGC                                 | stickleback 190bp forward |
| Gac_190_rev        | GCCGGGATCCTGTGTGTTTGCACACATCCC                                  | stickleback 190bp reverse |
| Gac_72_for         | GCCGGCTAGCAGGAGGTGTCCTGTCTAGACA                                 | stickleback 72bp forward  |
| Gac_72_rev         | GCCGGGATCCGAGGGAGGAGGAGGAAACATAAA                               | stickleback 72bp rev      |
| Dre_for            | GCCGGCTAGCCCCTGAAGTTCTGTGCTTTGATCA                              | zebrafish forward         |
| Dre_rev            | GCCGGGATCCAAGCTGGACATTCCTCTGCAATG                               | zebrafish reverse         |
| Gmo_for            | GCCGGCTAGCTGTGTACTAGGTGGAGGAGGGAGGGACCCAGGGAGGGGG<br>GGAGGACATT | cod forward               |
| Gmo temp1          | GACGGCCTGATGACAGGACACAGAGCTTCTGTTAATGTCCTCCCCCCC                | cod template 1            |
| Gmo temp2          | CTGTCATCAGGCCGTCTAGACAGGACACCTCCTAGACCTAATGAGGTC                | cod template 2            |
| Gmo_rev            | GCCGGGATCCGTGTGGGAGACAGAGAAAGACCTCATTAGGTCTAGGAGG               | cod reverse               |
| Ola_for            | AGTCGCTAGCAATGGAAGCAGTGTGGAGGAGG                                | medaka forward            |
| Ola_rev            | AGCTGGATCCGGCCCTAATCAGTTGTGTTCTGCA                              | medaka reverse            |

**Mutagenesis constructs**

| <b>Primer Name</b> | <b>Sequence</b>                                    | <b>Purpose</b>                  |
|--------------------|----------------------------------------------------|---------------------------------|
| Smad3_mut1_for     | ATTAGGTCTAGGAGGTGTCCTAAATAGACAGTGTGATGACAGGAC      | SMAD3 mut. first round forward  |
| Smad3_mut1_rev     | GTCCTGTCATCACACTGTCTATTTAGGACACCTCCTAGACCTAAT      | SMAD3 mut. first round reverse  |
| Smad3_mut2_for     | GTCCTGTCATCACACTAAATATTTAGGACACCTCCTAGACCTAATGAGGT | SMAD3 mut. second round forward |
| Smad3_mut2_rev     | ACCTCATTAGGTCTAGGAGGTGTCCTAAATATTTAGTGTGATGACAGGAC | SMAD3 mut. second round reverse |
| Pea3_mut1_for      | CTCCTCCTCCCTCTACTTTTAATTCACCCGCCGAACAC             | PEA3 mut. first round forward   |
| Pea3_mut1_rev      | GTGTTTCGGCGGGTGAATTAAGTAGAGGGAGGAGGAG              | PEA3 mut. first round reverse   |
| Pea3_mut2_for      | AGGACACAGAACCTCTGTTTAATGTTTGGCCTCCTCCCTCTAC        | PEA3 mut. second round forward  |
| Pea3_mut2_rev      | GTAGAGGGAGGAGGCCAAACATTAACAGAGGTTCTGTGTCCT         | PEA3 mut. second round reverse  |
| RAR_mut1_for       | CTCCTCCTCCCTCTACTTCCAATGGGCCCGCCGAACAC             | RAR mut. first round forward    |

|                |                                                    |                               |
|----------------|----------------------------------------------------|-------------------------------|
| RAR_mut1_rev   | GTGTTTCGGCGGGCCATTGGAAGTAGAGGGAGGAGGAG             | RAR mut. first round reverse  |
| RAR_mut2_for   | TTCACCCGCCGAACACACACAGGGCCTGCTCTGCC                | RAR mut. second round forward |
| RAR_mut2_rev   | GGCAGAGCAGGCCCTGTGTGTGTTTCGGCGGGTGAA               | RAR mut. second round reverse |
| TCF_mut1_for   | GCGCTCGCTTGAAAAGAGTCCGATTCAAGCAGACAAAG             | TCF mut. 1st round forward    |
| TCF_mut1_rev   | CTTTGTCTGCTTGAATCGGACTCTTTTCAAGCGAGCGC             | TCF mut. 1st round reverse    |
| TCF_mut2_for   | GTGATGACAGGACACAGAACGACTGTTTAATGTTTCCTCCTC         | TCF mut. 2nd round forward    |
| TCF_mut2_rev   | GAGGAGGAAACATTAACAGTCGTTCTGTGTCCTGTCATCAC          | TCF mut. 2nd round reverse    |
| TCF_mut3_for   | AATGTTTCCTCCTCCTCCGACTACTTCCAATTCACCCG             | TCF mut. 3rd round forward    |
| TCF_mut3_rev   | CGGGTGAATTGGAAGTAGTCGGAGGAGGAGGAAACATT             | TCF mut. 3rd round reverse    |
| TCF_mut4_for   | GAAAAGAGTCCGATTCAAGCAGATGCGGACCTCATTAGGTCTAGGAGGTG | TCF mut. 4th round forward    |
| TCF_mut4_rev   | CACCTCCTAGACCTAATGAGGTCCGCATCTGCTTGAATCGGACTCTTTTC | TCF mut. 4th round reverse    |
| Homeo mut1 for | GCGATTCAAGCAGACAAAGACCGGGGTAGGTCTAGGAGGTGTCCTGTC   | Homeodomain mut. forward      |
| Homeo_mut1_rev | GACAGGACACCTCCTAGACCTACCCCGGTCTTTGTCTGCTTGAATCGC   | Homeodomain mut. reverse      |

### **BAC recombineering**

| <b>Primer Name</b> | <b>Sequence</b>                                                                         | <b>Purpose</b>          |
|--------------------|-----------------------------------------------------------------------------------------|-------------------------|
| GFP_Bmp6_for       | CTGCAGCTCCAAGAGAGACCCACTTGGGACAGCGGAGAACACAGCGGGG<br>AGCCACCATGGTGAGCAAGGGCGAGGAGCTGTTC | GFP>Bmp6 recombineering |
| GFP_Bmp6_rev       | CCAAGGTTAACGAAGCTCATGACCATGTCTGCGTCATTTAGAAAGGCACTC<br>CGCGTGTAGGCTGGAGCTGCTTC          | GFP>Bmp6 recombineering |
| PTARBAC_tol2FWD    | GCGTAAGCGGGGCACATTTATTACCTCTTTCTCCGCACCCGACATAGATCC<br>CTGCTCGAGCCGGGCCCAAGTG           | iTol2 recombineering    |
| PTARBAC_tol2REV    | CGCGGGGCATGACTATTGGCGCGCCGGATCGATCCTTAATTAAGTCTACTAA<br>TTATGATCCTCTAGATCAGATCT         | iTol2 recombineering    |

All primers were designed from genomic sequences obtained from UCSC. Gac=*Gasterosteus aculeatus* (stickleback), Dre=*Danio rerio* (zebrafish), Gmo=*Gadus morhua* (Atlantic cod), Ola=*Oryzias latipes* (medaka). For constructs with multiple mutations, the order in which the mutations were introduced is indicated.

**Table S2. Enhancer activity of *cis*-regulatory sequences from four species in stickleback and zebrafish *trans* environments.**

|                                    | <i>cis</i> -regulatory element | # lines with median fin expression | # lines with pectoral fin expression | # lines with tooth expression |
|------------------------------------|--------------------------------|------------------------------------|--------------------------------------|-------------------------------|
| <b>Stickleback</b><br><i>trans</i> | zebrafish                      | 1/8                                | 1/8                                  | 0/8                           |
|                                    | cod                            | 5/7                                | 5/7                                  | 4/7                           |
|                                    | medaka                         | 4/5                                | 4/5                                  | 4/5                           |
|                                    | stickleback                    | 6/6                                | 6/6                                  | 6/6                           |
| <b>Zebrafish</b><br><i>trans</i>   | zebrafish                      | 4/7                                | 5/7                                  | 3/7                           |
|                                    | cod                            | 2/2                                | 2/2                                  | 2/2                           |
|                                    | medaka                         | 5/5                                | 5/5                                  | 5/5                           |
|                                    | stickleback                    | 2/2                                | 2/2                                  | 2/2                           |

Fish injected with each construct were outcrossed to wild-type fish, and offspring were scored for GFP fluorescence in the distal edge of the median fin, distal edge of the pectoral fin, and the pharyngeal teeth for each independent line. For stickleback, median and pectoral fins were scored at 5 dpf and teeth were scored post-hatching (12-20 dpf). For zebrafish, median fins were scored at 24 hpf, pectoral fins were scored at 48 hpf, and teeth were scored at 5 dpf.

**Table S3. Efficiency of molecular lesions produced by TALENs.**

| <b>clutch number</b> | <b>generation</b>  | <b>% molecular lesions</b> |
|----------------------|--------------------|----------------------------|
| 1                    | F0 injected        | 17/17 (100%)               |
| 2                    | F0 injected        | 19/19 (100%)               |
| 3                    | F0 injected        | 9/10 (90%)                 |
| <i>Average</i>       | <i>F0 injected</i> | <i>98%</i>                 |
| 4                    | F1 outcross        | 2/10 (20%)                 |
| 5                    | F1 outcross        | 5/10 (50%)                 |
| 6                    | F1 outcross        | 7/10 (70%)                 |
| 7                    | F1 outcross        | 6/9 (67%)                  |
| 8                    | F1 outcross        | 9/10 (90%)                 |
| <i>Average</i>       | <i>F1 outcross</i> | <i>59%</i>                 |

A subset of each TALEN clutch was screened at 2 dpf for TALEN-induced lesions. Molecular lesions were identified by PCR amplification with Gac\_190\_for and Gac\_72\_rev and digestion with XbaI (see Fig. 4G for illustration). An undigested band indicated the presence of a TALEN-induced lesion. Lesions were confirmed by Sanger sequencing for a subset of F1 animals, including parents of animals used for *in situ* hybridization (see Figure 6E).



**Table S4. RVDs used for TALEN construction.**

|            | <b>PfusA RVDs</b> | <b>PfusB RVDs</b> | <b>pLR RVD</b> |
|------------|-------------------|-------------------|----------------|
| <b>5':</b> | NG1               | NI1               | HD             |
|            | NI2               | NN2               |                |
|            | NN3               | NN3               |                |
|            | NN4               | NG4               |                |
|            | NG5               | NN5               |                |
|            | HD6               | NG6               |                |
|            | NG7               |                   |                |
|            | NI8               |                   |                |
|            | NN9               |                   |                |
|            | NN10              |                   |                |
| <b>3':</b> | NG1               | NN1               | NG             |
|            | HD2               | NG2               |                |
|            | NG3               | HD3               |                |
|            | NN4               | NI4               |                |
|            | NG5               |                   |                |
|            | NN6               |                   |                |
|            | NG7               |                   |                |
|            | HD8               |                   |                |
|            | HD9               |                   |                |
|            | NG10              |                   |                |

---

Individual RVD monomers were cloned into pFUS\_A and the appropriate pFUS\_B plasmid. The completed pFUS\_A and pFUS\_B plasmids were then combined into pTal3-DD (5') and pTal3-RR (3') with the appropriate pLR and sequence-verified by Sanger sequencing (Cermak et al., 2011).
